# Supplementary material for: The side-arm-effect controlled stereodivergent polymerization of 1-butene
Source: Royal Society of Chemistry journal article supplement (doi:10.1039/d5py00583c), 2025-01-01
Supplement: d5py00583c1.pdf [file d5py00583c1.pdf]

## Supporting Information

for

### The side-arm effect controlled stereodivergent polymerization of 1-butene

Guangyu Zhu,<sup>‡a,b</sup> Liang Wang, <sup>‡a,b</sup> Wenjie Tao,<sup>\*,a,b,c</sup> Hongbin Hou,<sup>a,b</sup> Guangqiang

Xu,<sup>a,b,c</sup> Bo Wang,<sup>a,b</sup> Qinggang Wang,<sup>\*,a,b,c</sup>

<sup>a</sup> Key Laboratory of Photoelectric Conversion and Utilization of Solar Energy, Qingdao Institute of Bioenergy and Bioprocess Technology, Chinese Academy of Sciences, Qingdao 266101, China.

<sup>b</sup> Shandong Energy Institute, Qingdao 266101, China.

<sup>c</sup> Center of Materials Science and Optoelectronics Engineering, University of Chinese Academy of Sciences, Beijing 100049, China.

<sup>‡</sup> These authors contributed equally to this work.

\*Corresponding authors: Wenjie Tao (E-mail: [taowj@qibebt.ac.cn](mailto:taowj@qibebt.ac.cn)), Qinggang Wang ([wangqg@qibebt.ac.cn](mailto:wangqg@qibebt.ac.cn)).

| <b>Table of content</b>                                                               | <b>Page Number</b> |
|---------------------------------------------------------------------------------------|--------------------|
| 1. Experimental Section .....                                                         | S1                 |
| 2. Supplementary Table .....                                                          | S4                 |
| 3. Synthesis and NMR Data of Ligands <b>L6a–L6e</b> . ....                            | S5                 |
| 4. Synthesis and NMR Data of Tridentate [O-NX] Titanium Complexes <b>6a–6e</b> . .... | S13                |
| 5. NMR Spectra of Polymers .....                                                      | S22                |
| 6. GPC Traces of Polymers.....                                                        | S26                |
| 7. DSC Data of Polymers.....                                                          | S35                |
| 8. WAXD data of Polymers .....                                                        | S38                |
| 9. Tensile-tests of Polymers .....                                                    | S41                |
| 10. Crystal Data .....                                                                | S43                |
| References:.....                                                                      | S47                |

## 1. Experimental Section

### 1.1 General.

All manipulations of oxygen/water sensitive materials were performed under a dry argon atmosphere using a glove-box or standard Schlenk techniques. Liquid 1-butene was purified by activated 4Å molecular sieves and stored in a pressure resistant bottle before use. All dry solvents were redistilled after collected from the solvent purification system and then stored over activated 4 Å molecular sieves in a glovebox. Deuterated solvents used for NMR spectroscopy were dried and distilled prior to use. Chromatographic tetrahydrofuran (THF) was purchased from Honeywell LTD for the analysis of GPC measurements. LDPE-2426H was purchased from CHN Energy Xinjiang Chemical Co. Ltd. All other chemicals were commercially available and used without appropriate purification. Reactions were monitored by thin layer chromatography (TLC) using silicycle pre-coated silica gel plates. Flash column chromatography was performed over silica gel (200-300 mesh).

### 1.2 Methods.

#### NMR

<sup>1</sup>H NMR spectra were recorded on a Bruker AV-400 spectrometer in chloroform-d. Chemical shifts are reported in ppm with the internal chloroform signal at 7.26 ppm as a standard. The data are being reported as (s = singlet, d = doublet, t = triplet, m = multiplet or unresolved, brs = broad singlet, coupling constant(s) in Hz, integration). <sup>13</sup>C NMR spectra were recorded on a Bruker AV-400 spectrometer in chloroform-d. Chemical shifts are reported in ppm with the internal chloroform signal at 77.0 ppm as a standard. The quantitative <sup>13</sup>C NMR spectra of poly(1-butene)s were recorded according to known references.<sup>1,2</sup>

#### GPC

Molecular weights ( $M_n$ s) and dispersities ( $\bar{D}$ ) of the polymers were determined by gel permeation chromatography (GPC, Agilent 1260 LC, USA) using THF as the eluent (flow rate: 1 mL/min, at 40 °C) and the sample concentration was 1 mg/mL. The curve

was calibrated using monodisperse polystyrene standards covering the molecular weight range from 580 to 460000 Da.

### **XRD**

X-Ray crystallographic data were collected using a Bruker AXSD8 X-ray diffractometer.

### **HRMS**

High resolution mass spectra (HRMS) were carried out with a Bruker ESI-Q-TOF MS/MS.

### **EA**

Elemental analysis (EA) was performed by the Analytical Laboratory of Shanghai Institute of Organic Chemistry (CAS).

### **DSC**

Differential scanning calorimetry (DSC) measurements were performed on DSC 3500 Sirius. The temperature was calibrated with C<sub>10</sub>H<sub>16</sub>, indium, tin, bismuth and zinc standard. Measurements were performed under N<sub>2</sub> atmosphere with a flow rate of 20 mL/min. Each sample with a mass of 10 mg was used for the measurement. The typical procedures for the measurements of samples were as follows: in the first heating scan, samples were heated from -80 °C to 200 °C at a heating rate of 10 K/min. In the second heating scan, samples were cooled to -80 °C at 10 K/min and kept at -80 °C for 20 min to eliminate any thermal history, and subsequently reheated to 200 °C at 10 K/min.

### **WAXD**

Wide-angle X-ray diffraction (WAXD) was measured by X-Ray Diffractometer on a D8 Advance, Bruker.

### **Stress-Strain**

Polymers were melt-pressed at 10 to 30 °C above their respective melting point to fabricate the dog-bone-shaped tensile-test specimens, which were subsequently aged for 24 hours prior to mechanical testing. The test specimens showed 12 mm gauge length, 2 mm width, and thickness of 0.6 mm. Stress-strain experiments were performed at 50 m/min using a Universal Test Machine (KEZHUN, KZ-SSBC-500) at room temperature.

### 1.3 Computational Details of Steric Maps

Corresponding DFT computations were carried out with the Gaussian 16 (Revision A.03) program.<sup>3</sup> Geometry optimizations and frequency calculations were performed using the B3LYP density functional<sup>4,5</sup> with Grimme's D3(BJ) dispersion.<sup>6</sup> The 6-31G(d,p)<sup>7-9</sup> basis set was adopted for all of the atoms. Frequency analysis was conducted at the same level of theory at 298.15K to confirm the stationary points as minima with zero imaginary frequencies. The steric map for analyzing catalytic pocket was built with SambVca 2.<sup>10</sup>

### 1.4 General Procedure of Polymerization of 1-Butene

After heat-drying a 50 mL sealed tube (equipped with a rubber stopper and magnetic stirrer) at 110 °C under vacuum and replacing the atmosphere with argon three times, connect the tube to a 1-butene gas supply. Once cooled to room temperature, place it in a low-temperature reactor set to -20 °C to condense liquid 1-butene. At this temperature, inject the alkylaluminum and titanium catalyst solution via syringe, stir for 5 min, and add the  $[\text{Ph}_3\text{C}][\text{B}(\text{C}_6\text{F}_5)_4]$  solution (when using methylaluminoxane as co-catalyst,  $[\text{Ph}_3\text{C}][\text{B}(\text{C}_6\text{F}_5)_4]$  did not need to be added, and the operation sequence was monomer-(M)MAO-catalysts). Seal with a PTFE plug and react at the specified temperature. After the required time, vent residual gas, pour the mixture into acidified ethanol to quench, stir thoroughly, filter, collect the polymer, and dry in a vacuum oven at 60 °C to constant weight.

## 2. Supplementary Table

**Table S1.** Polymerization of 1-butene with reported tridentate [O-NX] titanium complexes.<sup>a</sup>

| 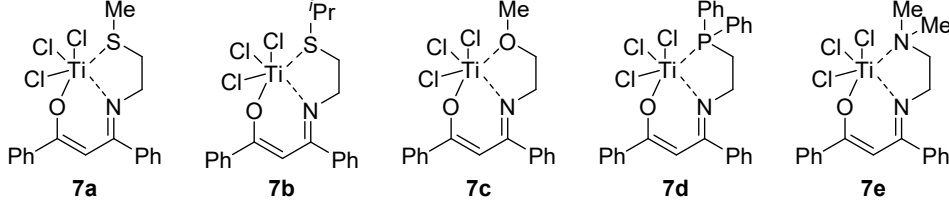 |           |                                                                                         |         |         |            |           |                   |
|------------------------------------------------------------------------------------|-----------|-----------------------------------------------------------------------------------------|---------|---------|------------|-----------|-------------------|
| Entry                                                                              | Cat.      | Co-cat.                                                                                 | Al/Ti/B | Solvent | Time (min) | Yield (g) | Act. <sup>b</sup> |
| 1                                                                                  | <b>7a</b> | MMAO                                                                                    | 500/1/0 | toluene | 120        | 0.73      | 0.37              |
| 2                                                                                  | <b>7a</b> | AlEt <sub>3</sub> /[Ph <sub>3</sub> C][B(C <sub>6</sub> F <sub>5</sub> ) <sub>4</sub> ] | 25/1/1  | toluene | 30         | 0.02      | 0.04              |
| 3                                                                                  | <b>7a</b> | AlEt <sub>3</sub> /[Ph <sub>3</sub> C][B(C <sub>6</sub> F <sub>5</sub> ) <sub>4</sub> ] | 25/1/1  | DCM     | 30         | n.p.      | n.r.              |
| 4                                                                                  | <b>7b</b> | MMAO                                                                                    | 500/1/0 | toluene | 120        | 0.73      | 0.37              |
| 5                                                                                  | <b>7c</b> | MMAO                                                                                    | 500/1/0 | toluene | 120        | 0.08      | 0.04              |
| 6                                                                                  | <b>7d</b> | MMAO                                                                                    | 500/1/0 | toluene | 120        | 0.92      | 0.46              |
| 7                                                                                  | <b>7e</b> | MMAO                                                                                    | 500/1/0 | toluene | 120        | n.p.      | n.r.              |

<sup>a</sup>Reaction conditions: 1-butene (2.4–2.5 g), **7** (0.01 mmol in 2 mL toluene), co-catalyst, 25 °C, 30–120 min, in a sealed tube, quenched by acidified ethanol until the set time. <sup>b</sup>Activity is in unit of 10<sup>5</sup> g·mol<sup>-1</sup>·h<sup>-1</sup>.

Initially, reported representative tridentate [O-NX] titanium complexes derived from 2-heteroatom substituted ethylamine, such as **7a–7e**, were tested in 1-butene polymerization because of their known performance in ethylene polymerization.<sup>11</sup> However, these reported complexes with side-arms bearing different heteroatoms all exhibited low activity, which may be due to the strong side-arm donors derived from alkylamines leading to lower Lewis acidity in the titanium center, resulting in weak coordination ability with monomers. Of note, alkylamine derived catalyst **7a** was not compatible with the alkyl aluminium/[Ph<sub>3</sub>C][B(C<sub>6</sub>F<sub>5</sub>)<sub>4</sub>] co-catalyst system (Table S1, entries 2, 3), while arylamine derived catalyst **6a** was exactly the opposite.

### 3. Synthesis and NMR Data of Ligands L6a–L6e.

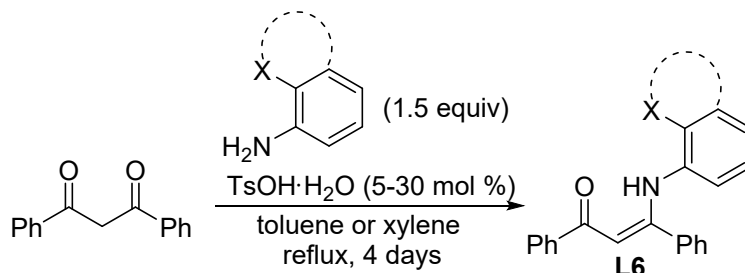

General procedure for the synthesis of ligands (taking **L6a** as an example): To a solution of 1,3-diphenylpropane-1,3-dione (10.0 mmol, 2.24 g) and 2-(methylthio)aniline (15.0 mmol, 2.09 g) in toluene (50 mL) was added 4-methylbenzenesulfonic acid hydrate (0.5 mmol, 0.10 g) at room temperature. The flask was equipped with a water separator. The reaction mixture was heated to reflux for 4 days and the progress was monitored by TLC. Then, the solvent was removed under reduced pressure and the residue was purified by column chromatography on silica gel to give yellow solid **L6a** (6.0 mmol, 2.08 g, 60% yield). The ligands **L6b–L6d** were all synthesized as in the steps described above.

Synthesis of **L6e**: To a solution of 1,3-diphenylpropane-1,3-dione (10.0 mmol, 2.24 g) and 8-aminoquinoline (15.0 mmol, 2.16 g) in xylene (50 mL) was added 4-methylbenzenesulfonic acid hydrate (3 mmol, 0.57 g) at room temperature. The flask was equipped with a water separator. The reaction mixture was heated to reflux for 4 days and the progress was monitored by TLC. Then, the solvent was removed under reduced pressure and the residue was purified by column chromatography on silica gel to give yellow solid **L6e** (6.6 mmol, 2.31 g, 66% yield).

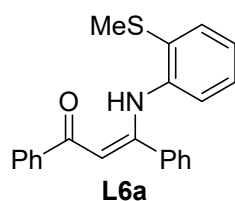

**Synthesis of L6a:** **L6a** was obtained in a yield of 60%.

<sup>1</sup>H NMR (400 MHz, CDCl<sub>3</sub>) δ 12.79 (s, 1H), 8.02 – 8.00 (m, 2H), 7.48 – 7.24 (m, 8H), 7.26 – 7.24 (m, 1H), 6.99 (td, *J* = 7.6, 1.2 Hz, 1H), 6.78 (td, *J* = 7.6, 1.2 Hz, 1H), 6.43 (d, *J* = 8.0 Hz, 1H), 6.17 (s, 1H), 2.54 (s, 3H).

**<sup>13</sup>C NMR** (100 MHz, CDCl<sub>3</sub>) δ 189.8, 161.4, 139.8, 138.0, 136.0, 132.3, 131.3, 129.7, 128.5, 128.3, 128.2, 127.4, 127.1, 125.1(1), 125.0(7), 124.9, 97.6, 15.8.

**ESI-MS** Calcd for [C<sub>22</sub>H<sub>20</sub>NOS]<sup>+</sup> (M + H<sup>+</sup>) 346.1260, found 346.1260.

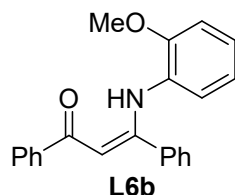

**Synthesis of L6b:** **L6b** was obtained in a yield of 73%.

**<sup>1</sup>H NMR** (400 MHz, CDCl<sub>3</sub>) δ 12.74 (s, 1H), 7.98 (d, *J* = 8.0 Hz, 2H), 7.48 – 7.31 (m, 8H), 6.94 (td, *J* = 8.0, 1.6 Hz, 1H), 6.85 (dd, *J* = 8.4, 1.2 Hz, 1H), 6.56 (td, *J* = 7.6, 1.2 Hz, 1H), 6.39 (d, *J* = 8.0 Hz, 1H), 6.09 (s, 1H), 3.90 (s, 3H).

**<sup>13</sup>C NMR** (100 MHz, CDCl<sub>3</sub>) δ 189.4, 160.9, 151.2, 140.1, 136.3, 131.1, 129.5, 128.7, 128.4, 128.2, 128.0, 127.3, 124.5, 123.4, 119.9, 110.8, 97.4, 55.7.

**ESI-MS** Calcd for [C<sub>22</sub>H<sub>20</sub>NO<sub>2</sub>]<sup>+</sup> (M + H<sup>+</sup>) 330.1489, found 330.1490.

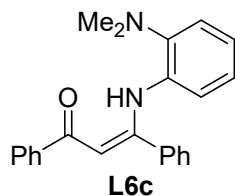

**Synthesis of L6c:** **L6c** was obtained in a yield of 81%.

**<sup>1</sup>H NMR** (400 MHz, CDCl<sub>3</sub>) δ 12.75 (s, 1H), 7.98 (dd, *J* = 8.0, 1.6 Hz, 2H), 7.48 – 7.33 (m, 8H), 7.01 (d, *J* = 8.0 Hz, 1H), 6.64 (td, *J* = 7.6, 1.6 Hz, 1H), 6.64 (td, *J* = 7.6, 1.6 Hz, 1H), 6.38 (dd, *J* = 8.0, 1.2 Hz, 1H), 6.09 (s, 1H), 2.83 (s, 6H).

**<sup>13</sup>C NMR** (100 MHz, CDCl<sub>3</sub>) δ 189.3, 160.3, 146.0, 140.2, 136.5, 133.3, 131.1, 129.5, 128.5, 128.3, 127.8, 127.3, 124.3, 123.8, 122.0, 119.0, 97.2, 43.60.

**ESI-MS** Calcd for [C<sub>23</sub>H<sub>22</sub>N<sub>2</sub>NaO]<sup>+</sup> (M + Na<sup>+</sup>) 365.1624, found 365.1642.



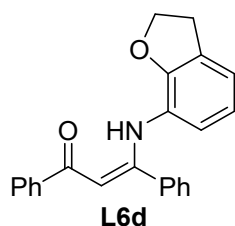

**Synthesis of L6d:** L6d was obtained in a yield of 90%.

**<sup>1</sup>H NMR** (400 MHz, CDCl<sub>3</sub>) δ 12.79 (s, 1H), 7.98 (dd, *J* = 8.0, 1.6 Hz, 2H), 7.47 – 7.33 (m, 8H), 6.84 (dd, *J* = 7.2, 1.2 Hz, 1H), 6.49 (t, *J* = 7.6 Hz, 1H), 6.24 (d, *J* = 8.0 Hz, 1H), 6.08 (s, 1H), 4.58 (t, *J* = 8.8 Hz, 2H), 3.20 (t, *J* = 8.8 Hz, 2H).

**<sup>13</sup>C NMR** (100 MHz, CDCl<sub>3</sub>) δ 189.4, 161.3, 151.9, 139.9, 136.2, 131.1, 129.6, 128.4, 128.3, 128.1, 127.7, 127.3, 123.3, 121.8, 120.5, 120.1, 96.9, 71.7, 30.2.

**ESI-MS** Calcd for [C<sub>23</sub>H<sub>20</sub>NO<sub>2</sub>]<sup>+</sup> (M + H<sup>+</sup>) 342.1489, found 342.1452.

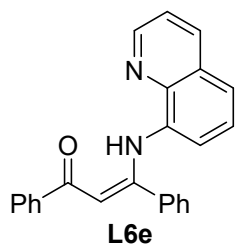

**Synthesis of L6e:** L6e was obtained in a yield of 66%.

**<sup>1</sup>H NMR** (400 MHz, CDCl<sub>3</sub>) δ 13.72 (s, 1H), 9.09 (dd, *J* = 4.0, 1.6 Hz, 1H), 8.12 (dd, *J* = 8.4, 1.6 Hz, 1H), 8.06 – 8.04 (m, 2H), 7.53 – 7.35 (m, 10H), 7.08 (t, *J* = 8.0 Hz, 1H), 6.49 (d, *J* = 7.6 Hz, 1H), 6.22 (s, 1H).

**<sup>13</sup>C NMR** (100 MHz, CDCl<sub>3</sub>) δ 189.9, 158.9, 149.6, 140.6, 140.0, 136.6, 136.6, 136.0, 131.3, 129.7, 128.8, 128.6, 128.3, 128.1, 127.6, 125.9, 121.8, 121.5, 118.4, 99.9.

**ESI-MS** Calcd for [C<sub>24</sub>H<sub>18</sub>N<sub>2</sub>NaO]<sup>+</sup> (M + Na<sup>+</sup>) 373.1311, found 342.1316.

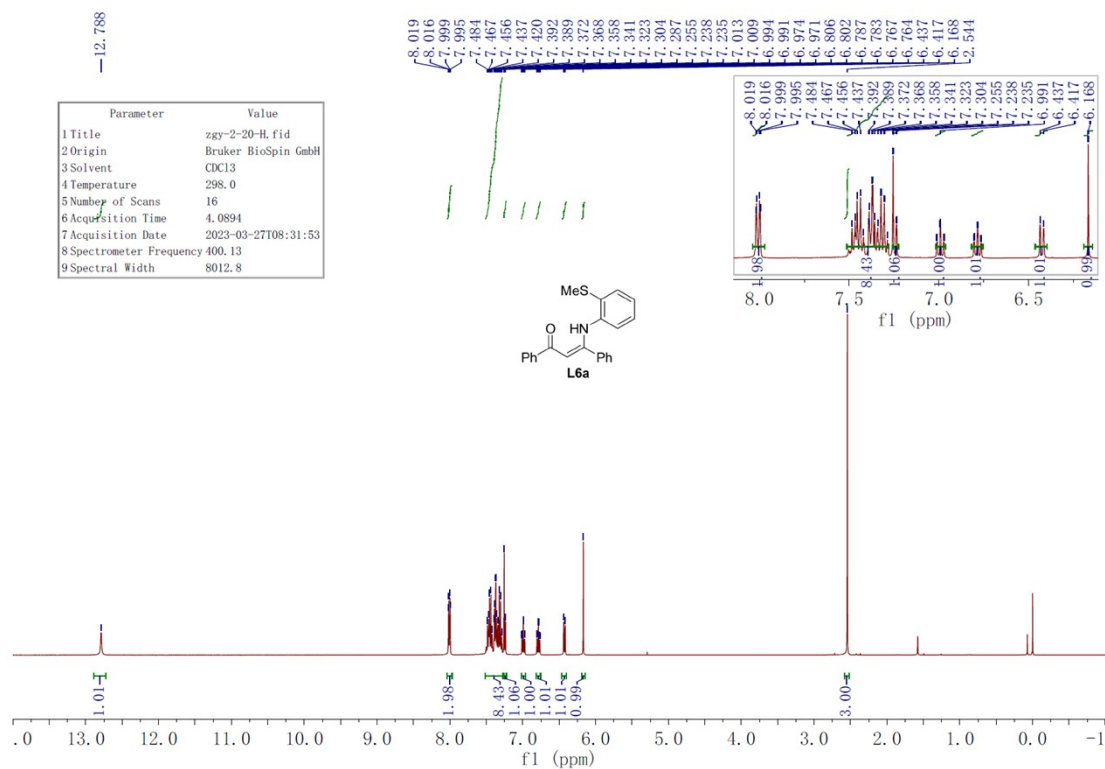

**Figure S1.**  $^1\text{H}$  NMR spectrum (400 MHz, 298 K,  $\text{CDCl}_3$ ) of L6a.

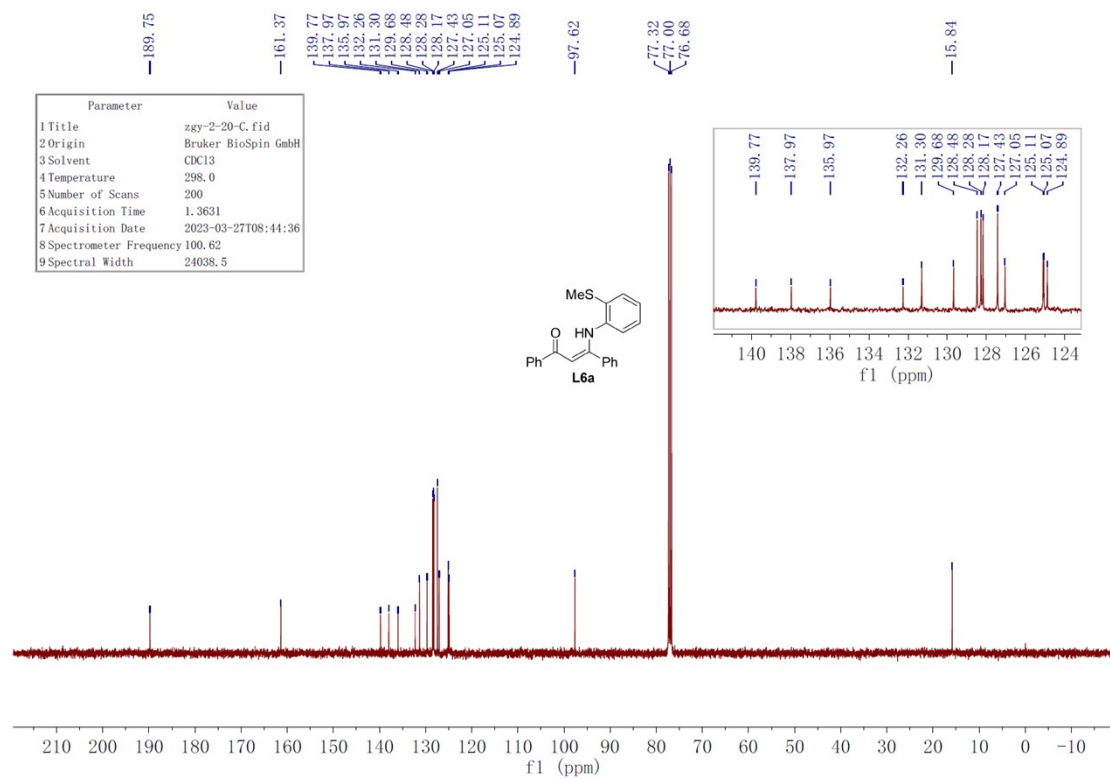

**Figure S2.**  $^{13}\text{C}$  NMR spectrum (100 MHz, 298 K,  $\text{CDCl}_3$ ) of L6a.

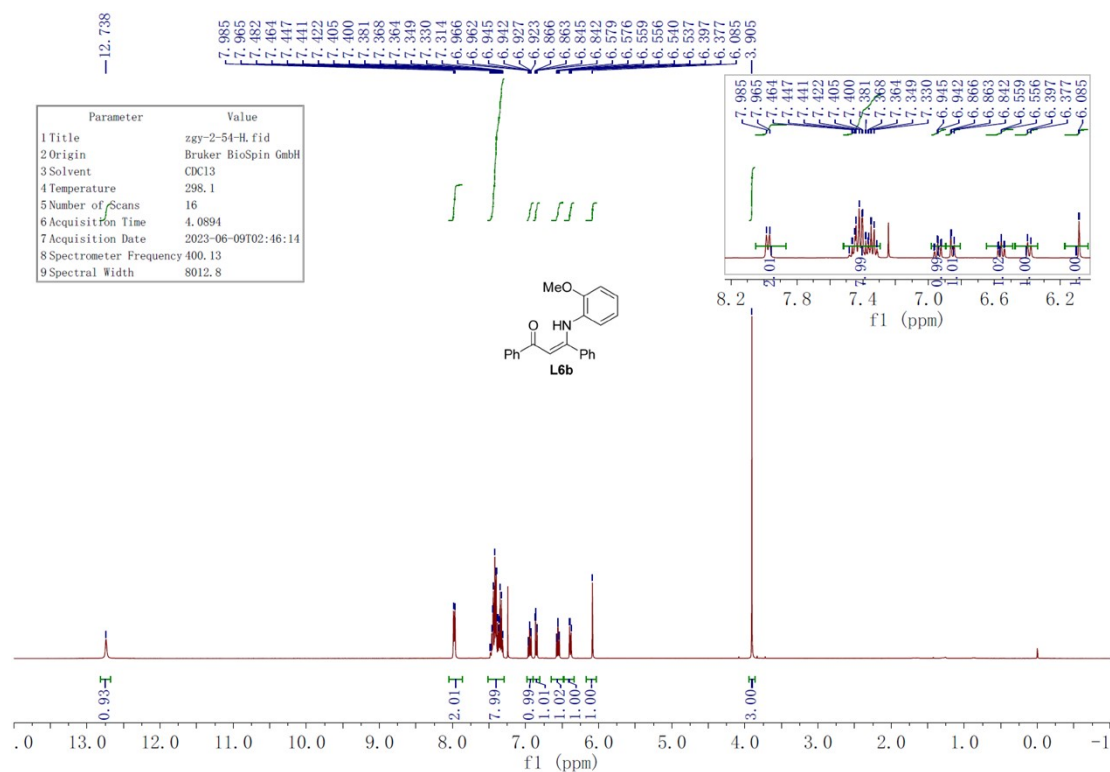

**Figure S3.**  $^1\text{H}$  NMR spectrum (400 MHz, 298 K,  $\text{CDCl}_3$ ) of **L6b**.

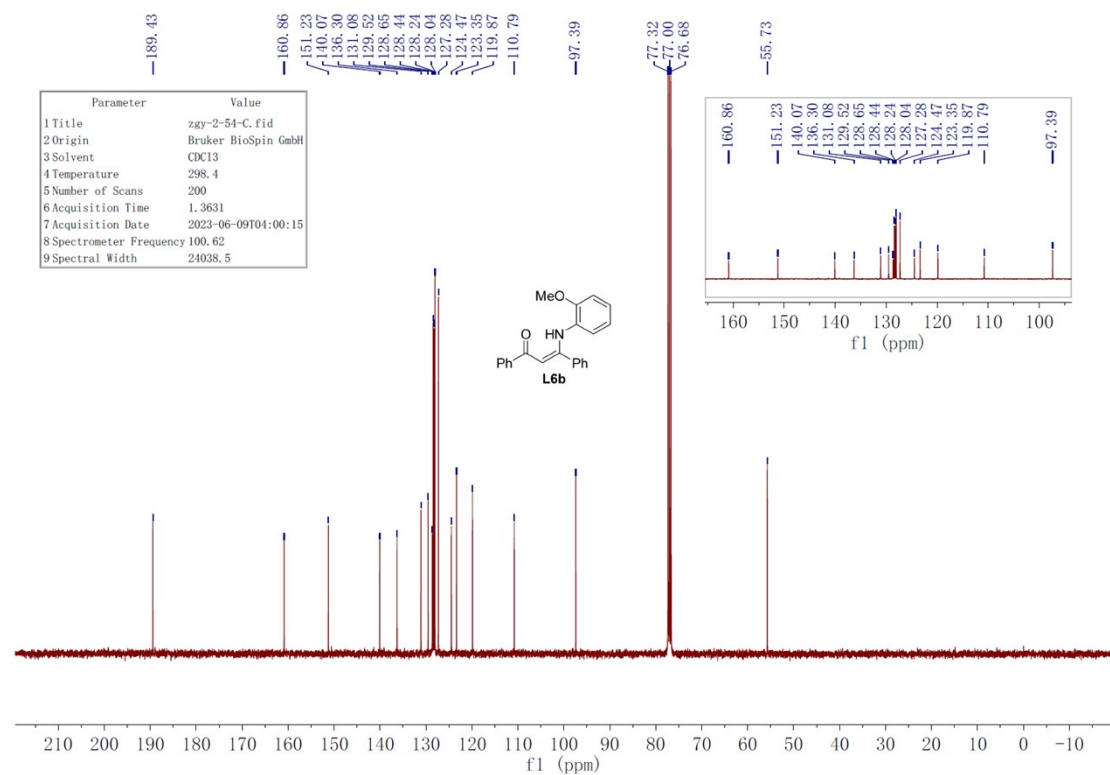

**Figure S4.**  $^{13}\text{C}$  NMR spectrum (100 MHz, 298 K,  $\text{CDCl}_3$ ) of **L6b**.

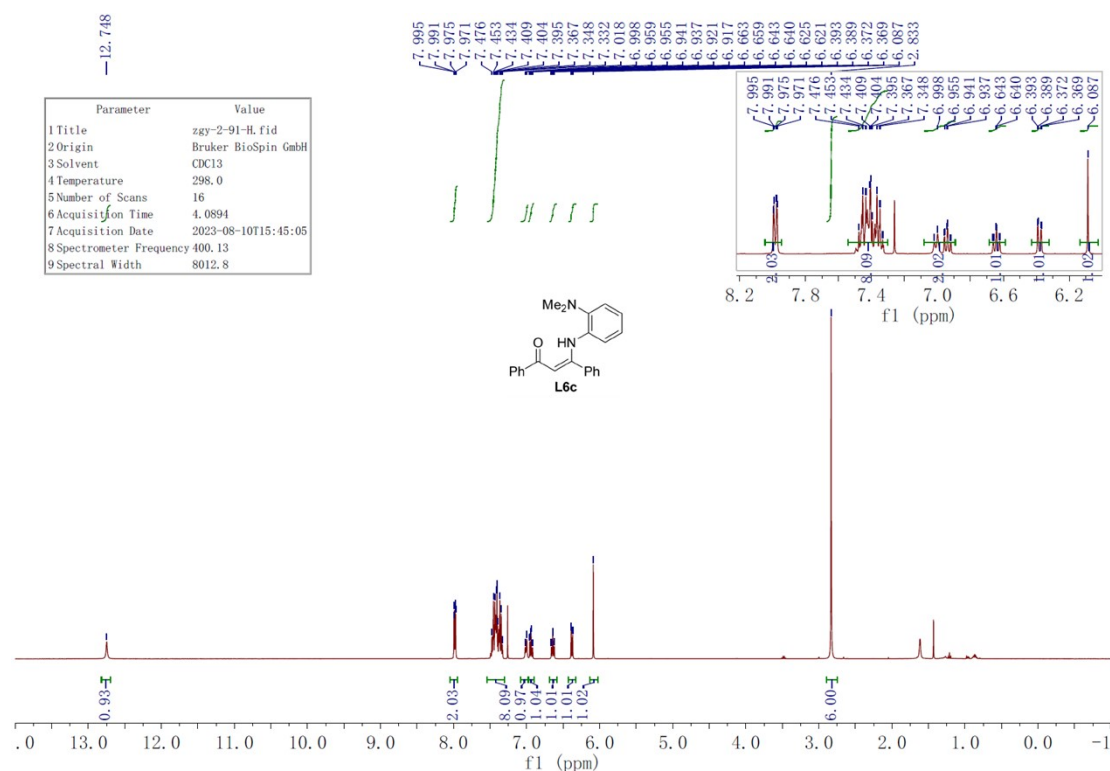

**Figure S5.** <sup>1</sup>H NMR spectrum (400 MHz, 298 K, CDCl<sub>3</sub>) of L6c.

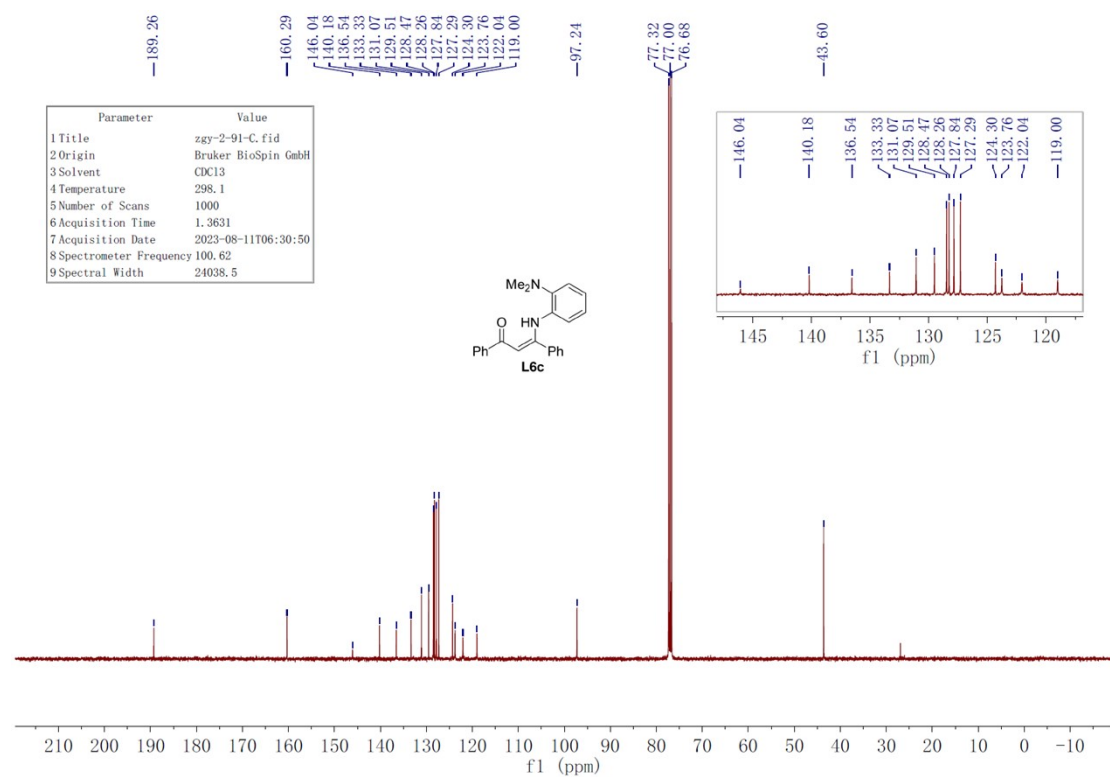

**Figure S6.** <sup>13</sup>C NMR spectrum (100 MHz, 298 K, CDCl<sub>3</sub>) of L6c.

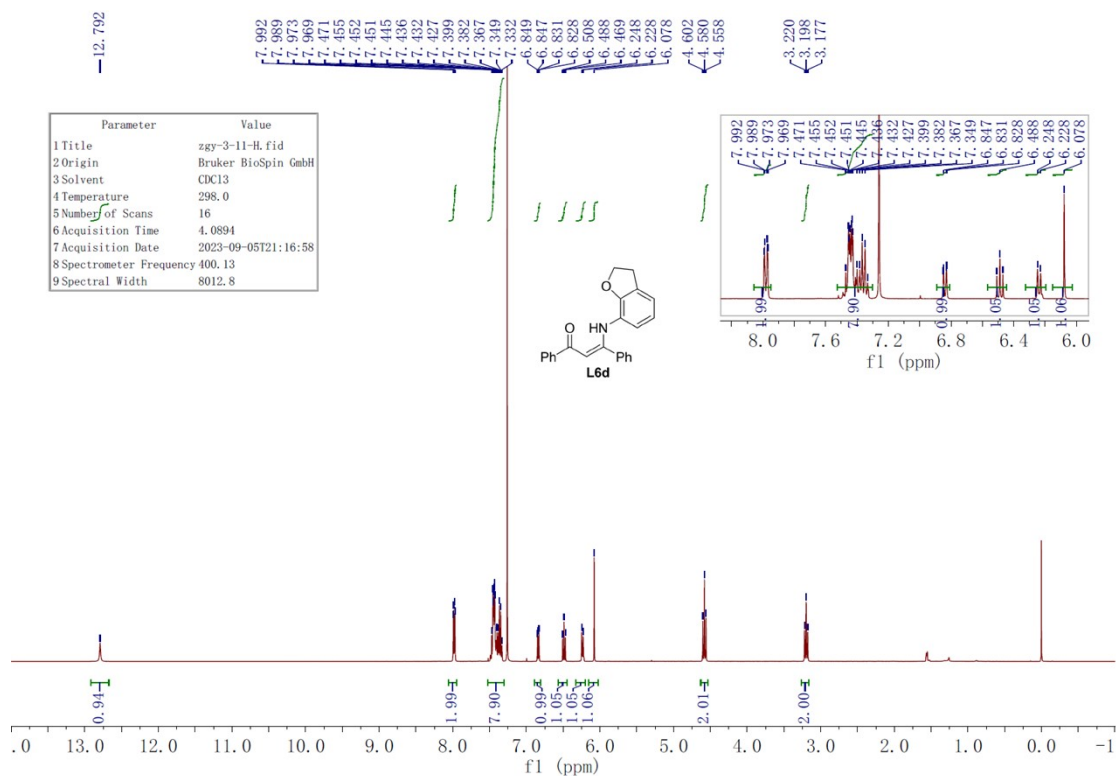

**Figure S7.** <sup>1</sup>H NMR spectrum (400 MHz, 298 K, CDCl<sub>3</sub>) of L6d.

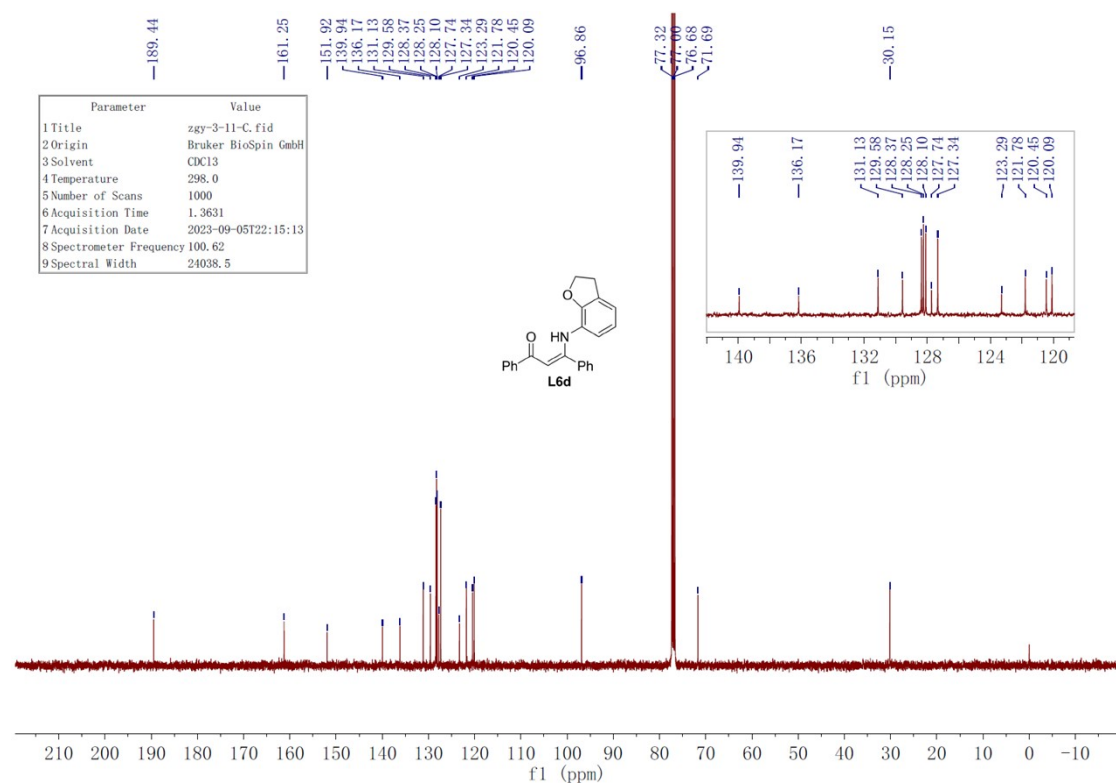

**Figure S8.** <sup>13</sup>C NMR spectrum (100 MHz, 298 K, CDCl<sub>3</sub>) of L6d.

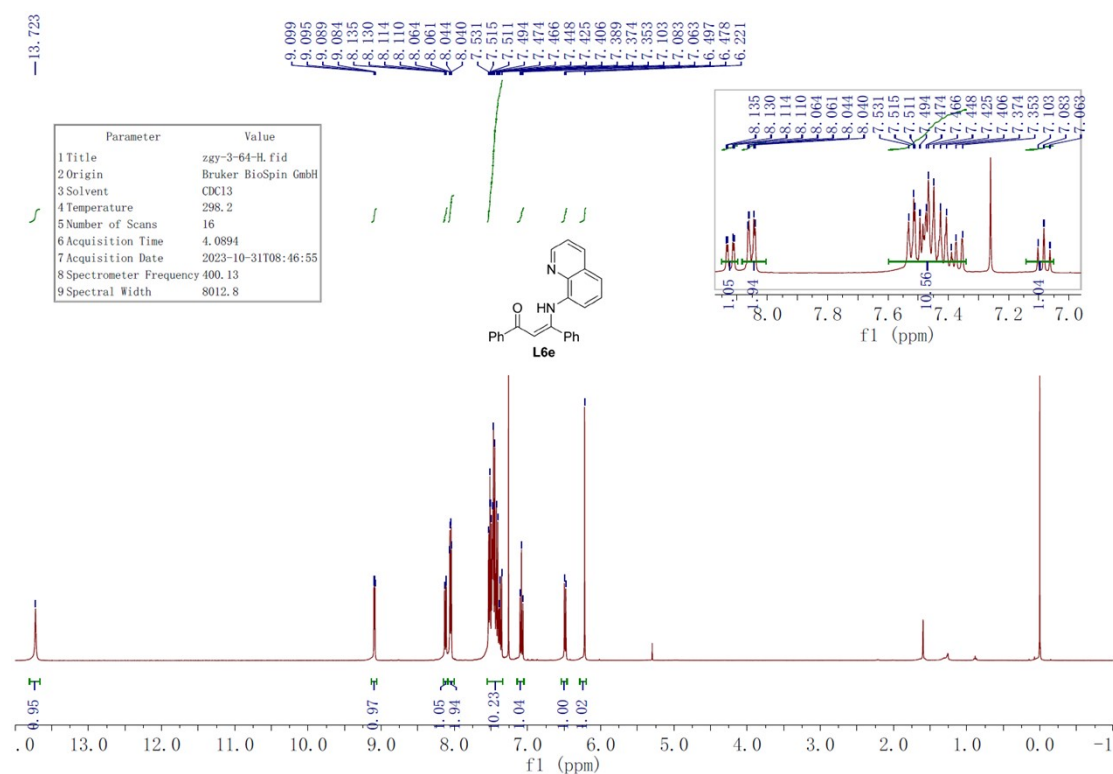

**Figure S9.** <sup>1</sup>H NMR spectrum (400 MHz, 298 K, CDCl<sub>3</sub>) of **L6e**.

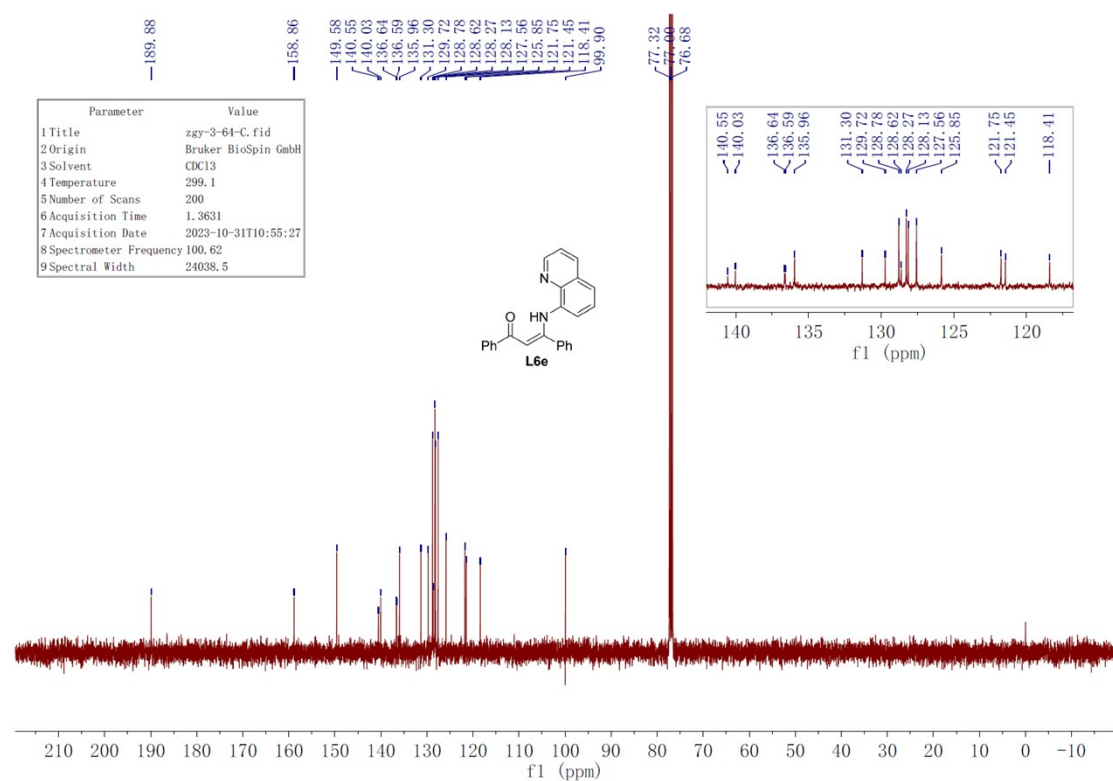

**Figure S10.** <sup>13</sup>C NMR spectrum (100 MHz, 298 K, CDCl<sub>3</sub>) of **L6e**.

#### 4. Synthesis and NMR Data of Tridentate [O-NX] Titanium Complexes **6a–6e**.

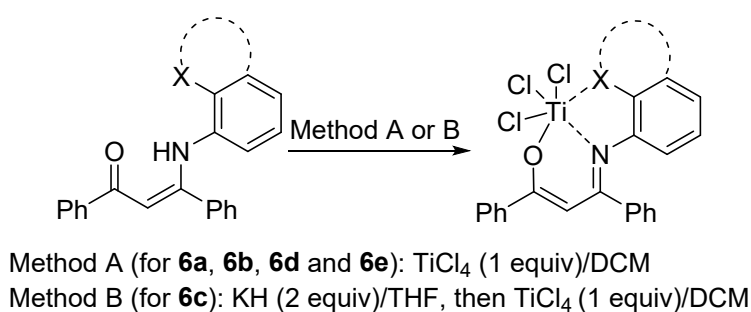

General procedure for the synthesis of **6a**, **6b**, **6d** and **6e** (Taking **6a** as an example, Method A): To a solution of ligand **L6a** (0.2 mmol, 69.1 mg) in dry DCM (5 mL) was added dropwise a solution of  $\text{TiCl}_4$  (0.2 mmol, 37.9 mg) in dry DCM (1 mL) at room temperature. The solution was stirred for 3 h and filtered to remove the insoluble solid. The filtrate was concentrated under vacuum and added dropwise to 10 mL of hexane. The black solid precipitated from hexane was obtained and collected to yield complex **6a** (84.4 mg, 85%). Complexes **6b**, **6d** and **6e** were synthesized as above.

Synthesis of **6c** (Method B): To a suspension of potassium hydride (KH) (0.4 mmol, 16.0 mg) in dry THF (1 mL) was added a solution of **L6c** (0.2 mmol, 68.5 mg) in THF (5 mL) at  $-78^\circ\text{C}$ . The resulting suspension was warmed to room temperature and stirred for 3 h. The solvent was removed under reduced pressure and the residue was dissolved in dry DCM (5 mL), and a solution of  $\text{TiCl}_4$  (0.2 mmol, 37.9 mg) in dry DCM (1 mL) was added dropwise into above deprotonated ligand solution at room temperature. The solution was stirred for 12 h and filtered to remove the sylvite and other insoluble solid. The filtrate was concentrated under vacuum and then added dropwise to 10 mL of hexane. The black solid precipitated from hexane was obtained and collected to yield complex **6c** (67.9 mg, 69%).

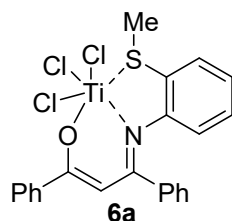

**Synthesis of 6a** (Method A): **6a** was obtained in a yield of 85%.





Anal. calcd. for C<sub>23</sub>H<sub>21</sub>Cl<sub>3</sub>N<sub>2</sub>OTi: C 55.74; H 4.27. Found: C 55.94; H 4.53.

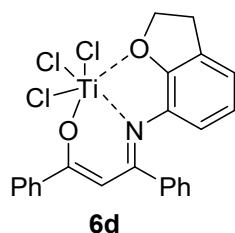

**Synthesis of 6d** (Method A): **6d** was obtained in a yield of 67%.

**<sup>1</sup>H NMR** (400 MHz, CDCl<sub>3</sub>) δ 7.87 – 7.85 (m, 2H), 7.55 – 7.41 (m, 8H), 6.96 (dd, *J* = 7.2, 0.8 Hz, 1H), 6.54 (t, *J* = 8.0 Hz, 1H), 6.43 (s, 1H), 5.81 (d, *J* = 8.4 Hz, 1H), 5.51 (t, *J* = 8.0 Hz, 2H), 3.45 (t, *J* = 8.0 Hz, 2H).

**<sup>13</sup>C NMR** (100 MHz, CDCl<sub>3</sub>) δ 171.2, 169.0, 152.4, 137.6, 132.7, 131.4, 130.8, 130.0, 129.6, 129.1, 127.5, 127.1, 125.7, 124.5, 124.0, 120.8, 112.2, 81.5, 30.14.

Anal. calcd. for C<sub>23</sub>H<sub>18</sub>Cl<sub>3</sub>NO<sub>2</sub>Ti: C 55.85; H 3.67. Found: C 56.14; H 3.85.

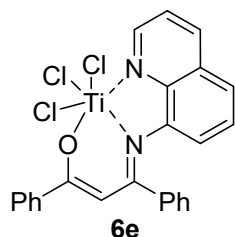

**Synthesis of 6e** (Method A): **6e** was obtained in a yield of 76%.

**<sup>1</sup>H NMR** (400 MHz, CDCl<sub>3</sub>) δ 9.72 (dd, *J* = 4.8, 1.6 Hz, 1H), 8.43 (d, *J* = 8.4 Hz, 1H), 8.01 (d, *J* = 7.2 Hz, 2H), 7.72 (dd, *J* = 8.4, 4.8 Hz, 1H), 7.61 (d, *J* = 8.0 Hz, 1H), 7.56 (d, *J* = 7.2 Hz, 1H), 7.51 – 7.43 (m, 3H), 7.38 (t, *J* = 7.6 Hz, 2H), 7.31 – 7.30 (m, 2H), 7.18 (t, *J* = 8.0 Hz, 1H), 6.71 (s, 1H), 6.67 (d, *J* = 8.0 Hz, 1H).

**<sup>13</sup>C NMR** (100 MHz, CDCl<sub>3</sub>) δ 173.1, 171.4, 151.6, 143.7, 142.4, 140.0, 138.3, 133.0, 132.1, 130.4, 129.4, 129.1, 128.0, 127.7, 127.3, 125.6, 124.4, 122.6, 112.2.

Anal. calcd. for C<sub>24</sub>H<sub>17</sub>Cl<sub>3</sub>N<sub>2</sub>OTi·1.5 CH<sub>2</sub>Cl<sub>2</sub> (1.5 equiv. DCM in the tested sample): C 48.54; H 3.19. Found: C 48.11; H 3.05.

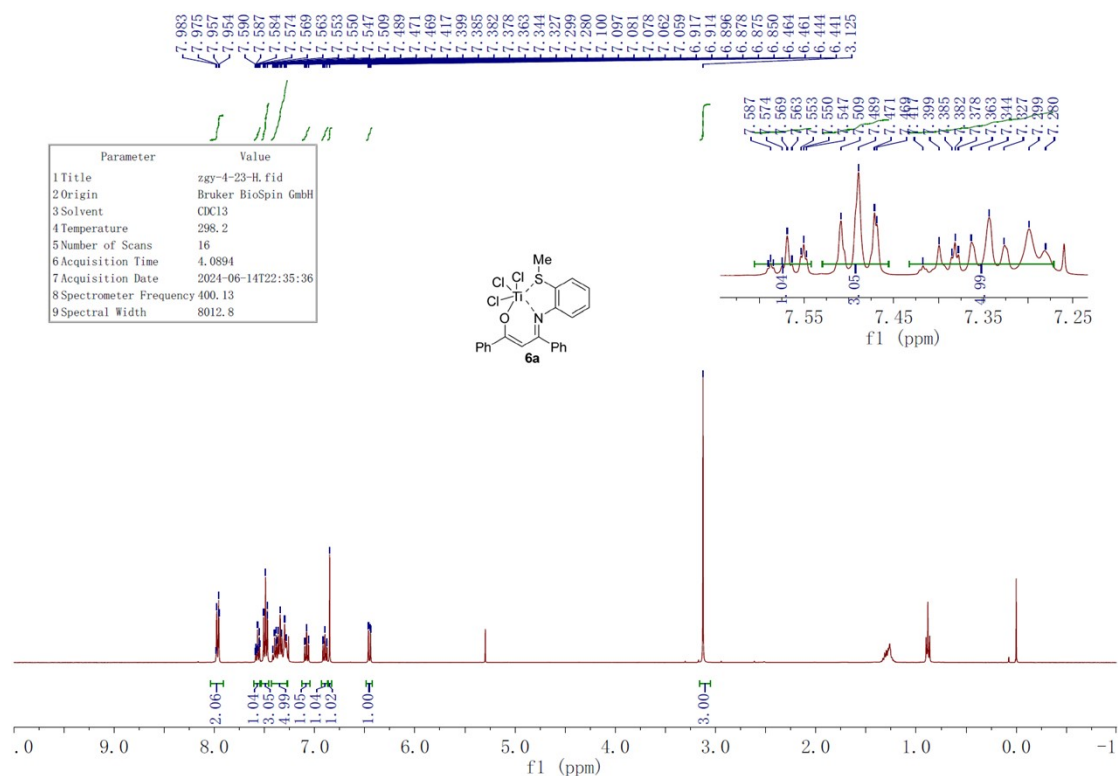

**Figure S11.** <sup>1</sup>H NMR spectrum (400 MHz, 298 K, CDCl<sub>3</sub>) of **6a**.

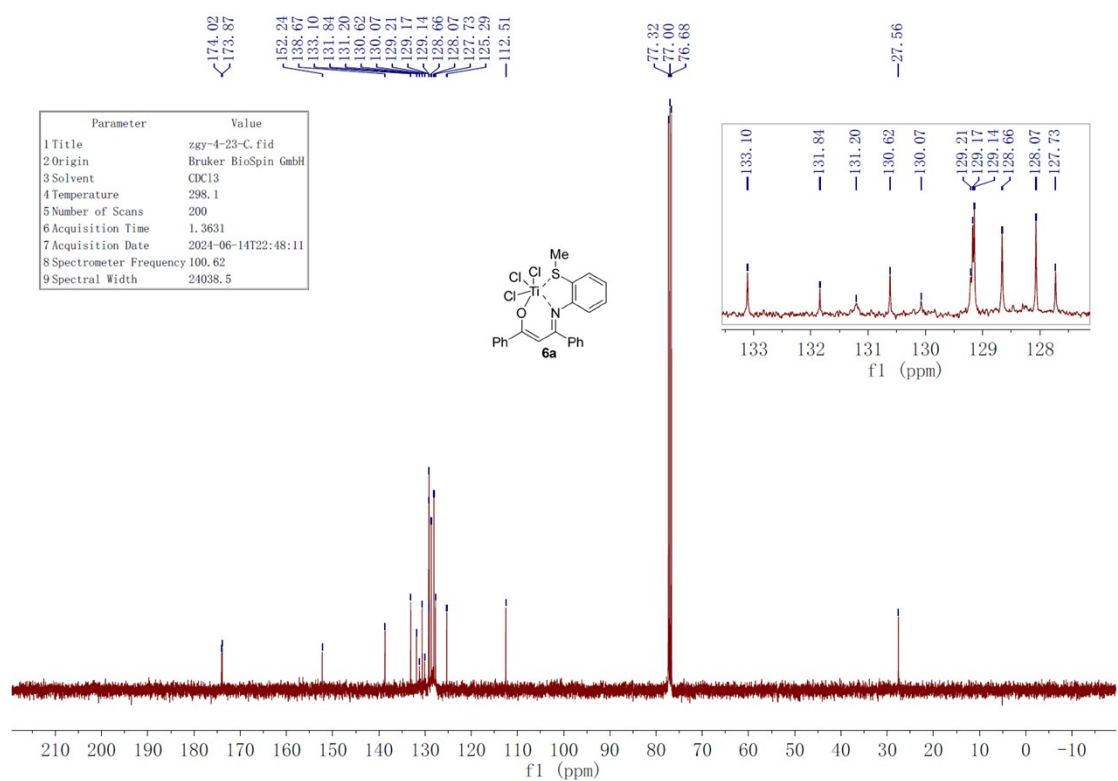

**Figure S12.** <sup>13</sup>C NMR spectrum (100 MHz, 298 K, CDCl<sub>3</sub>) of **6a**.

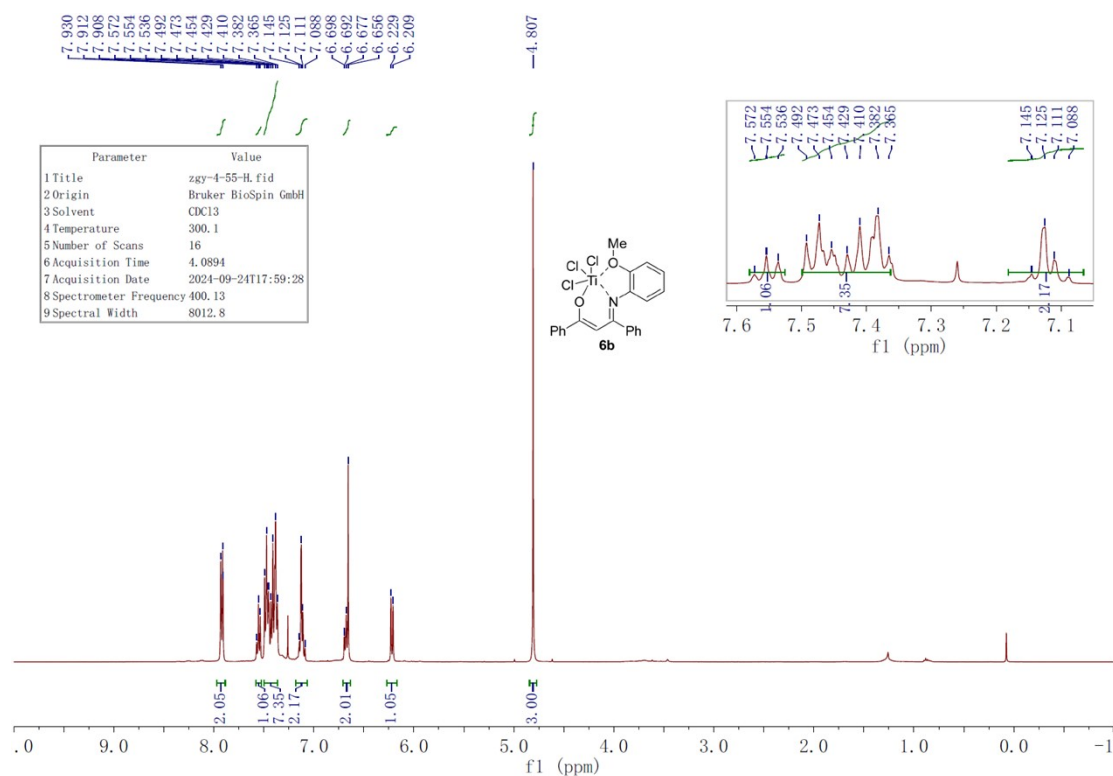

**Figure S13.**  $^1\text{H}$  NMR spectrum (400 MHz, 298 K,  $\text{CDCl}_3$ ) of **6b**.

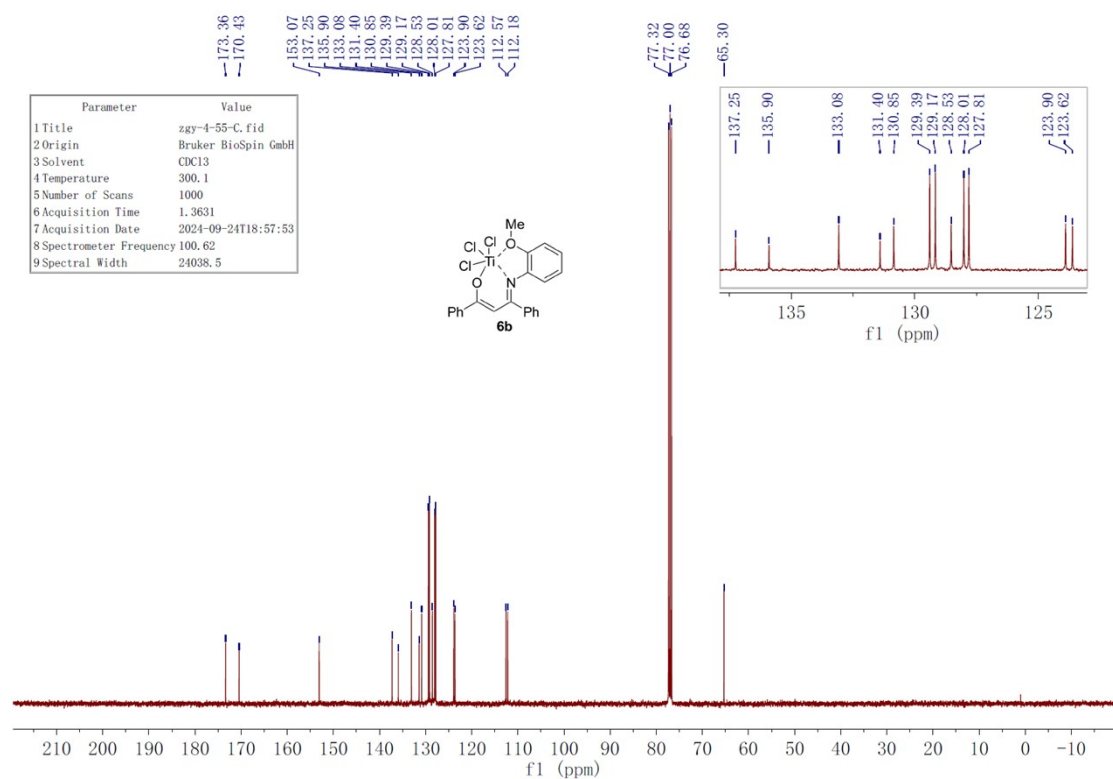

**Figure S14.**  $^{13}\text{C}$  NMR spectrum (100 MHz, 298 K,  $\text{CDCl}_3$ ) of **6b**.

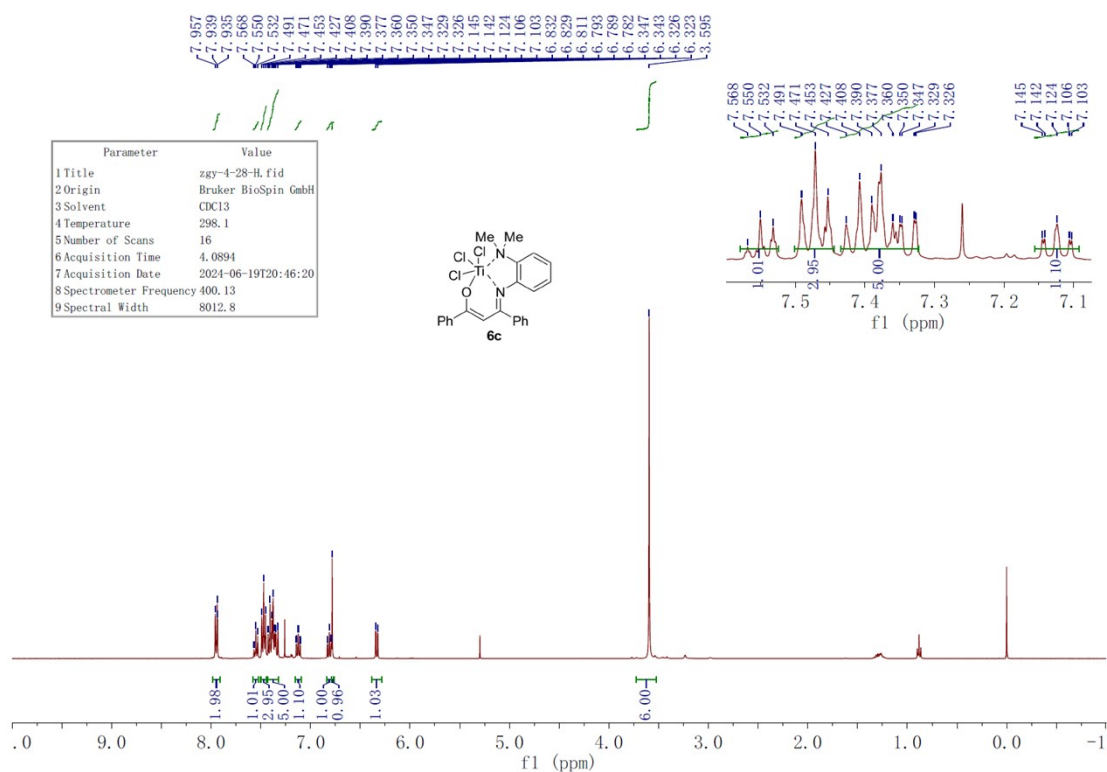

**Figure S15.**  $^1\text{H}$  NMR spectrum (400 MHz, 298 K,  $\text{CDCl}_3$ ) of **6c**.

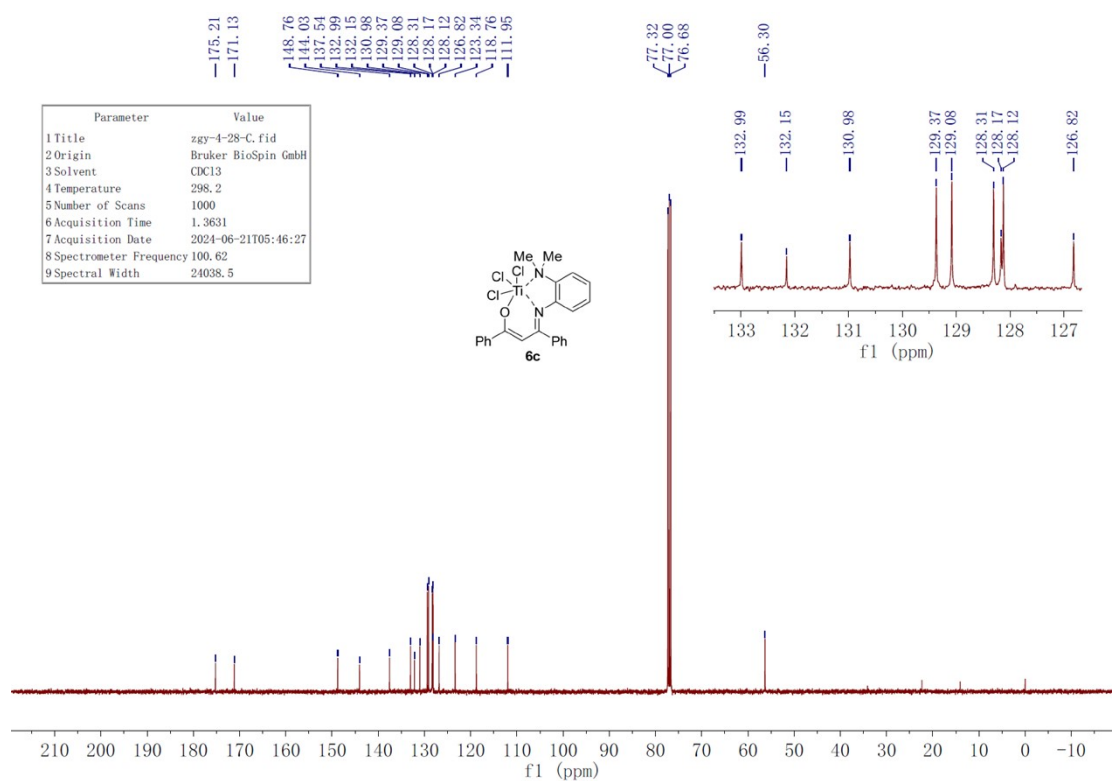

**Figure S16.**  $^{13}\text{C}$  NMR spectrum (100 MHz, 298 K,  $\text{CDCl}_3$ ) of **6c**.

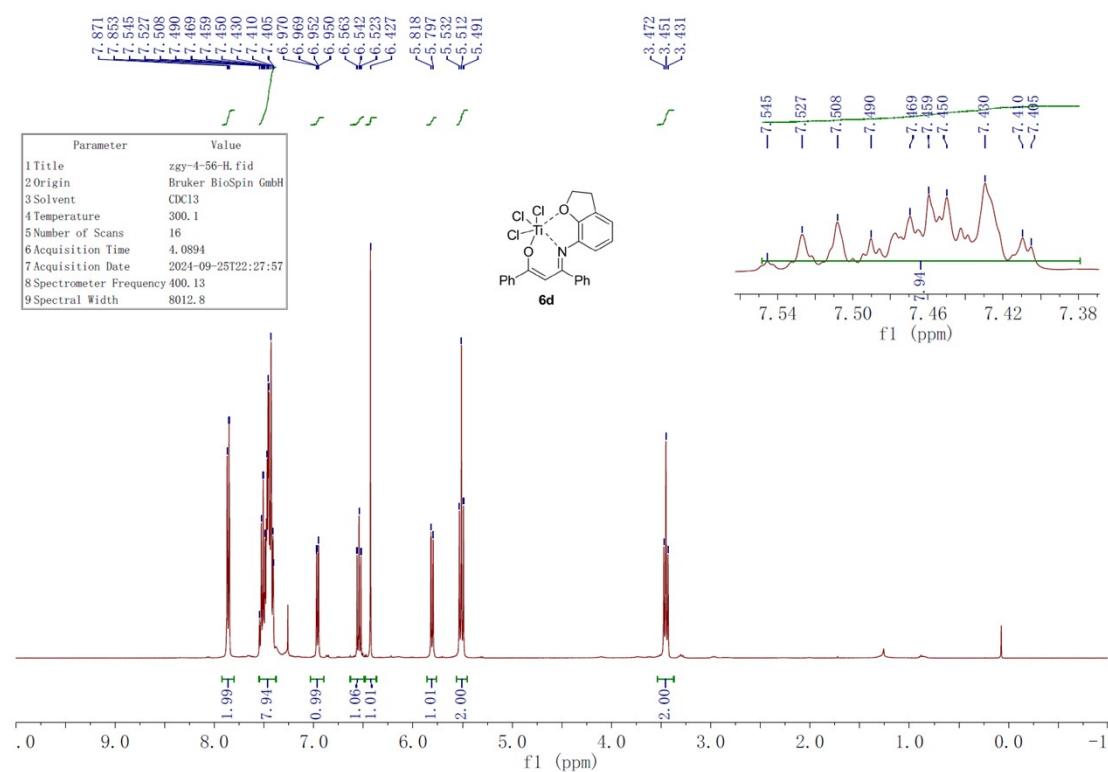

**Figure S17.**  $^1\text{H}$  NMR spectrum (400 MHz, 298 K,  $\text{CDCl}_3$ ) of **6d**.

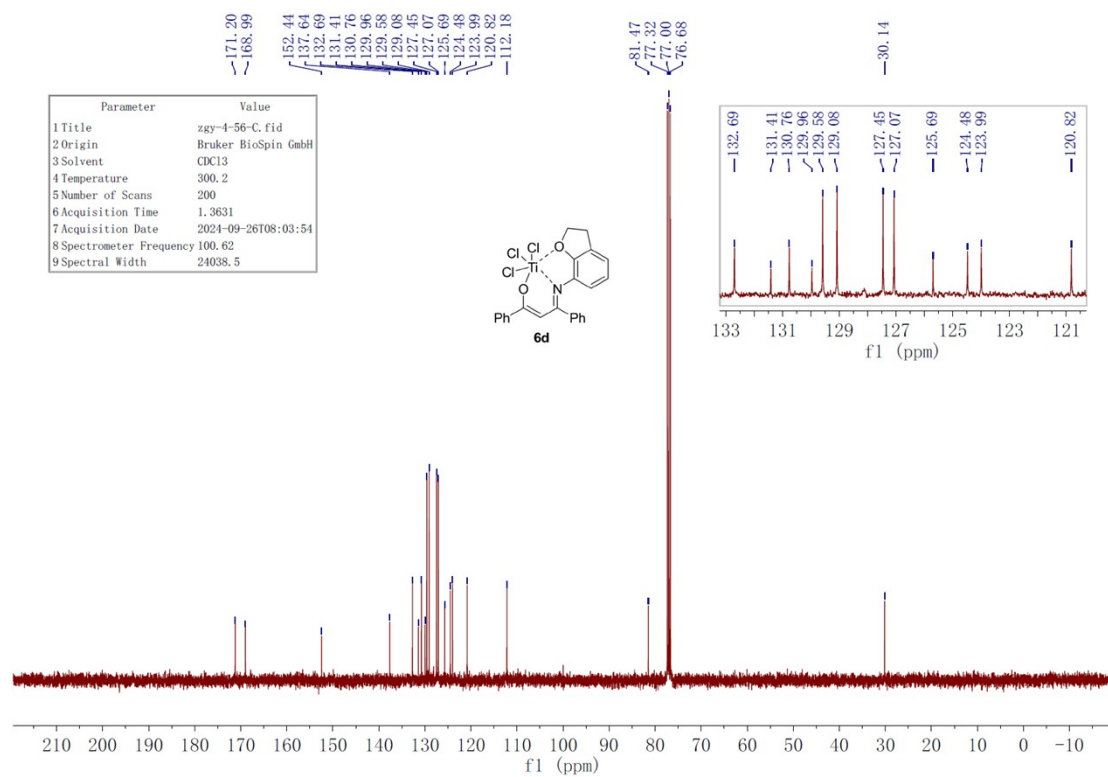

**Figure S18.**  $^{13}\text{C}$  NMR spectrum (100 MHz, 298 K,  $\text{CDCl}_3$ ) of **6d**.

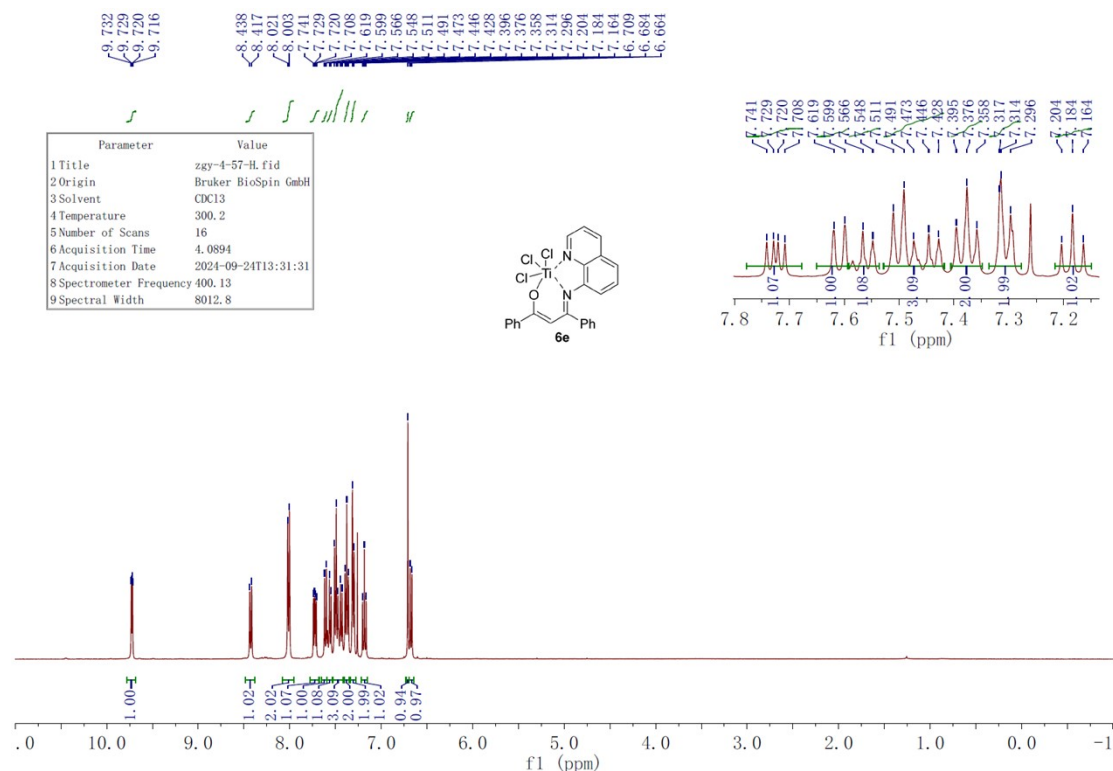

**Figure S19.** <sup>1</sup>H NMR spectrum (400 MHz, 298 K, CDCl<sub>3</sub>) of **6e**.

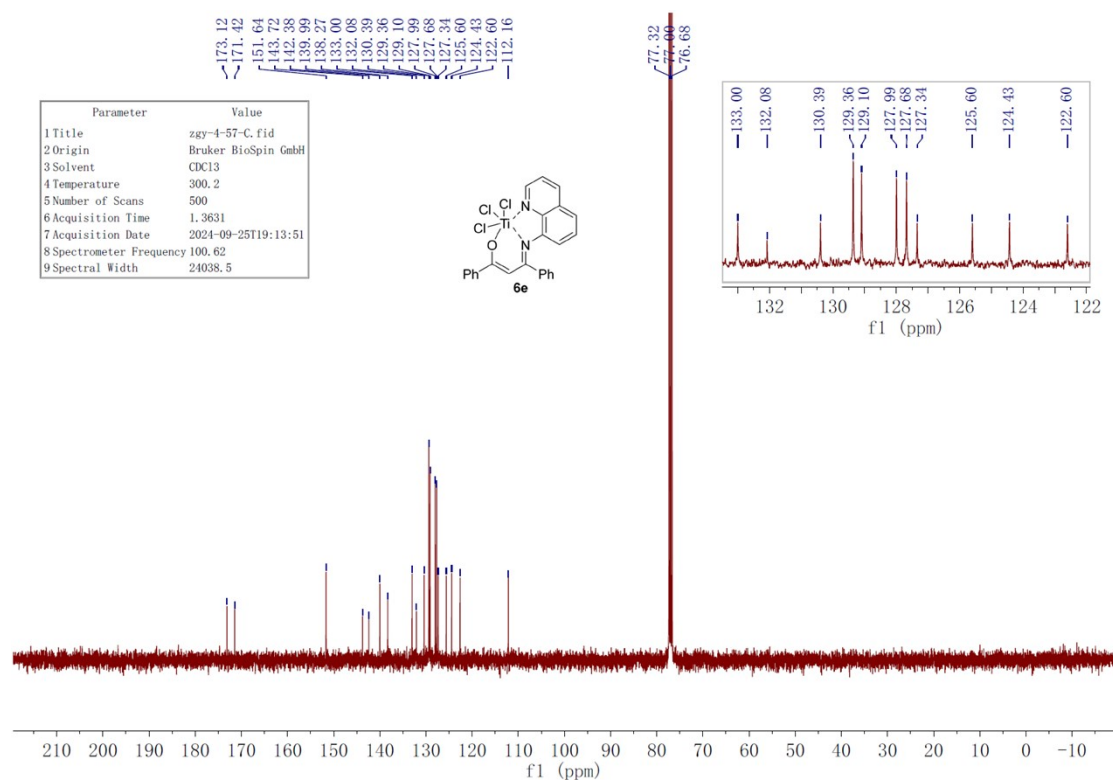

**Figure S20.** <sup>13</sup>C NMR spectrum (100 MHz, 298 K, CDCl<sub>3</sub>) of **6e**.



## 5. NMR Spectra of Polymers

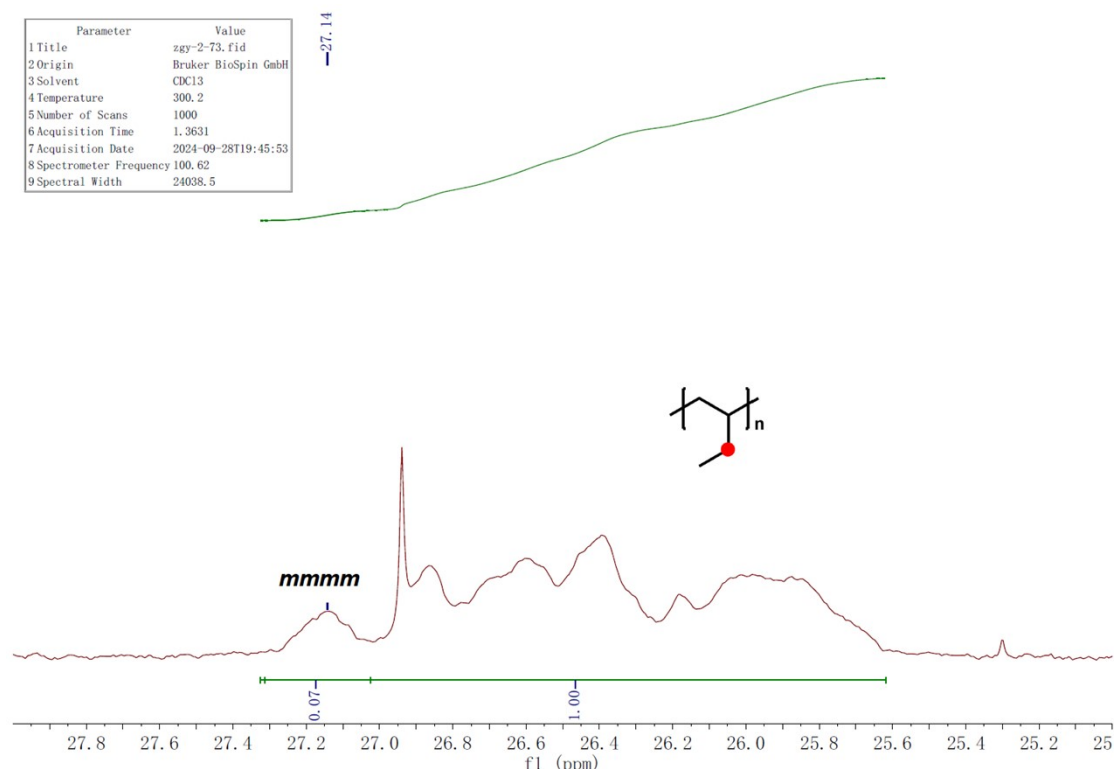

**Figure S21.** Quantitative <sup>13</sup>C NMR spectrum (100 MHz, CDCl<sub>3</sub>, 298 K) of the poly(1-butene) generated by complex **6a** from Table 1, Entry 10 or Table 2, Entry 1.

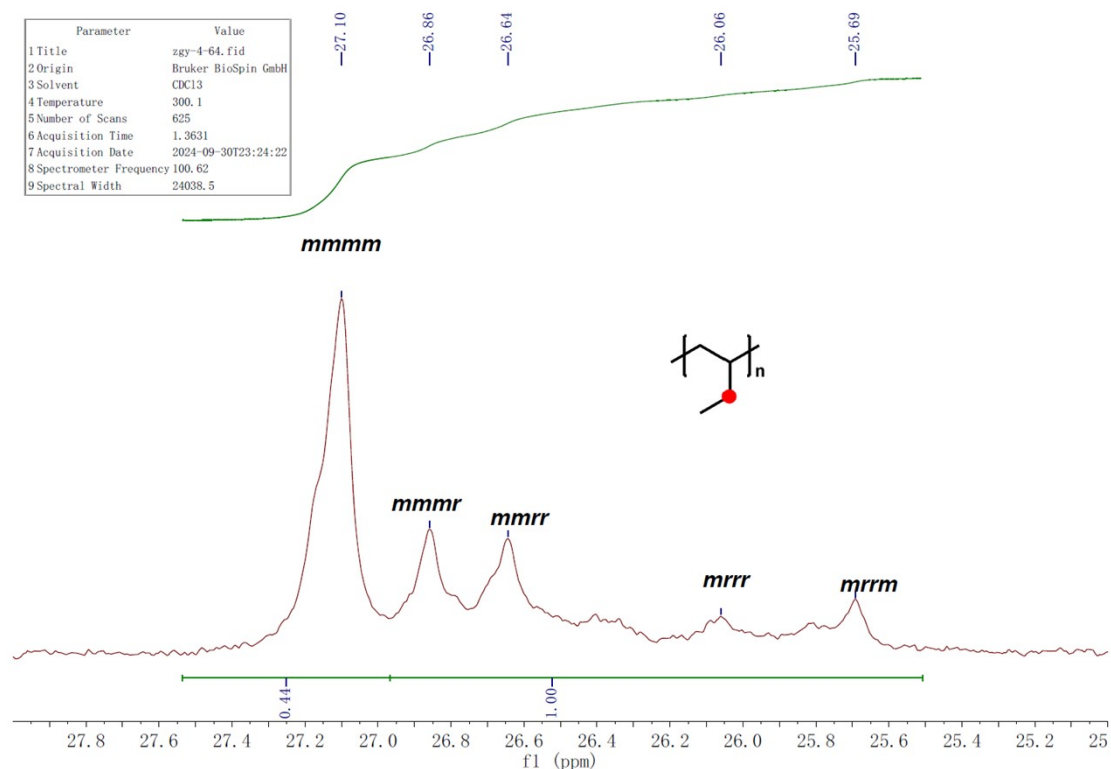

**Figure S22.** Quantitative <sup>13</sup>C NMR spectrum (100 MHz, CDCl<sub>3</sub>, 298 K) of the poly(1-butene) generated by complex **6b** from Table 2, Entry 2.



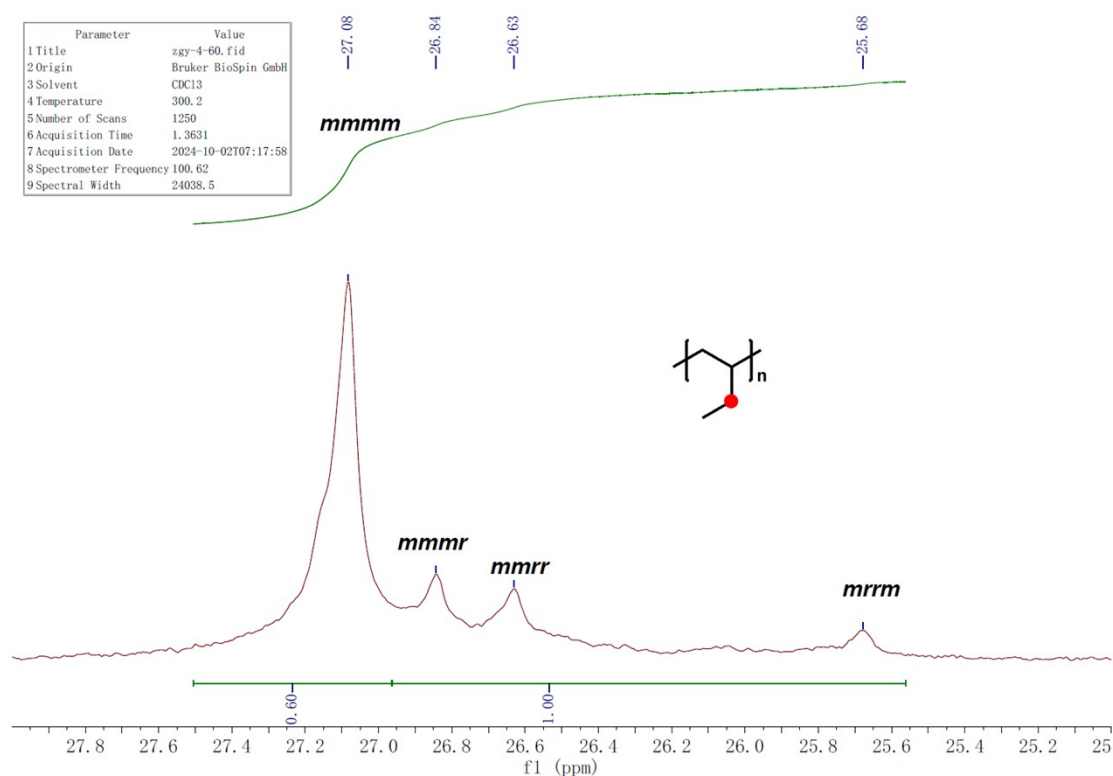

**Figure S23.** Quantitative  $^{13}\text{C}$  NMR spectrum (100 MHz,  $\text{CDCl}_3$ , 298 K) of the poly(1-butene) generated by complex **6d** from Table 2, Entry 5.

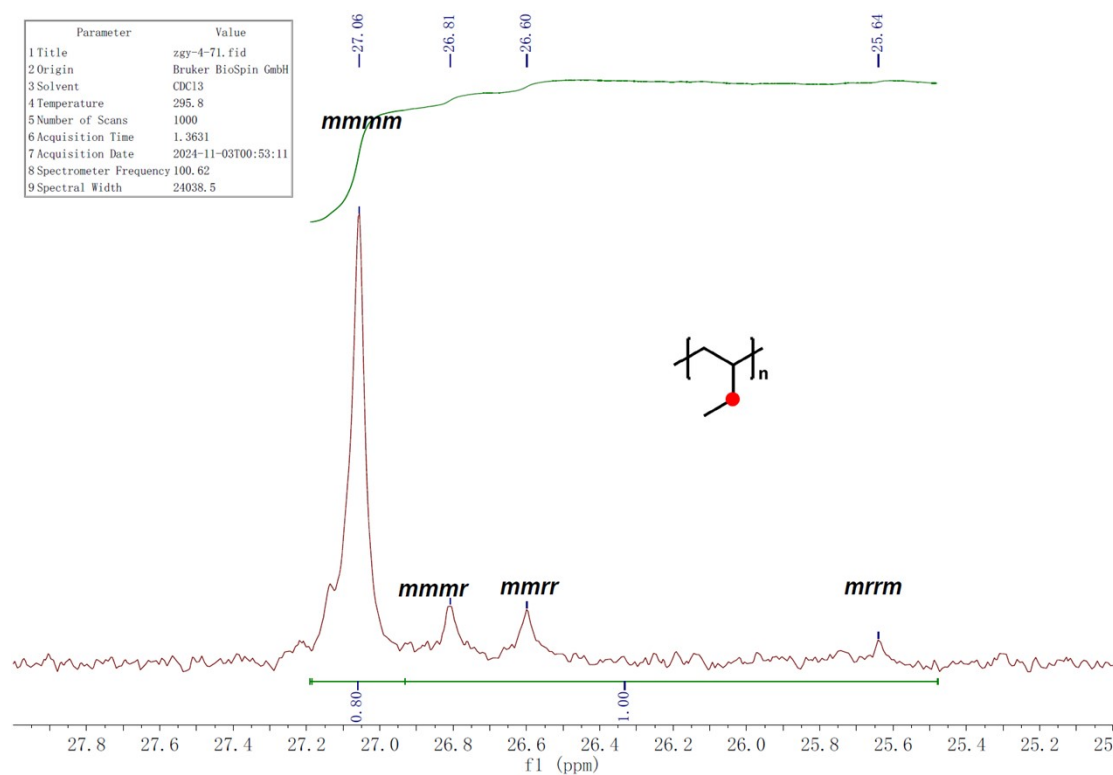

**Figure S24.** Quantitative  $^{13}\text{C}$  NMR spectrum (100 MHz,  $\text{CDCl}_3$ , 298 K) of the poly(1-butene) generated by complex **6d** from Table 2, Entry 6.

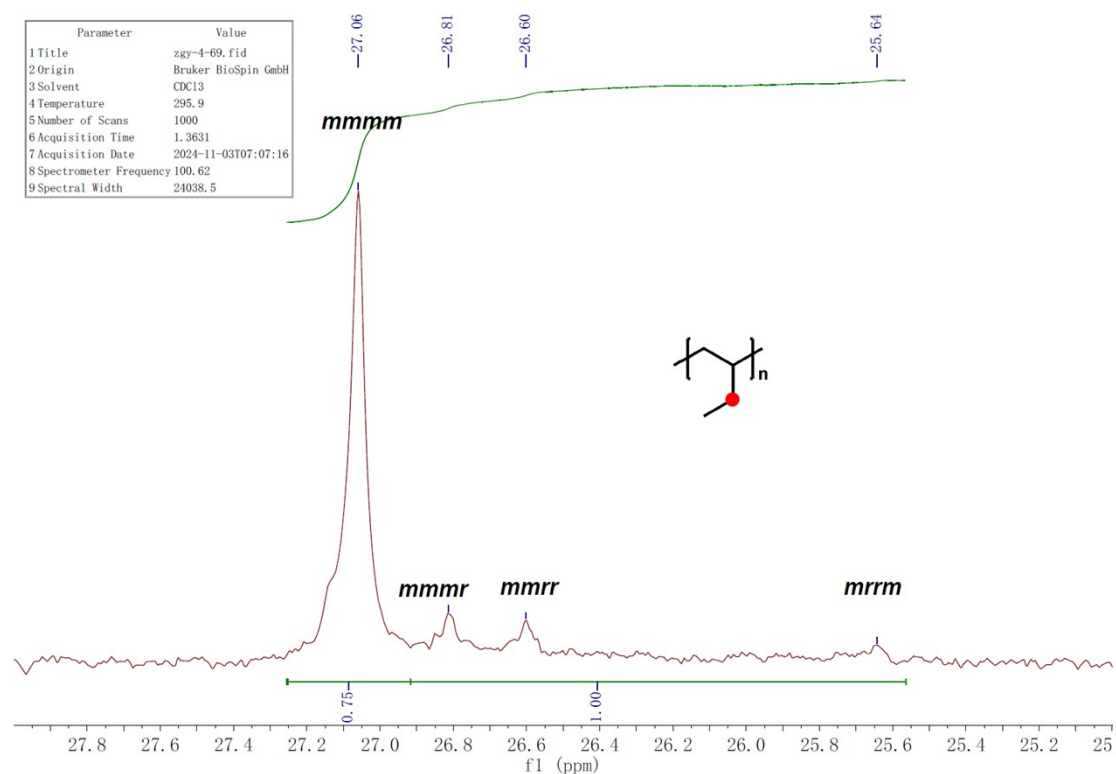

**Figure S25.** Quantitative  $^{13}\text{C}$  NMR spectrum (100 MHz,  $\text{CDCl}_3$ , 298 K) of the poly(1-butene) generated by complex **6d** from Table 2, Entry 7.

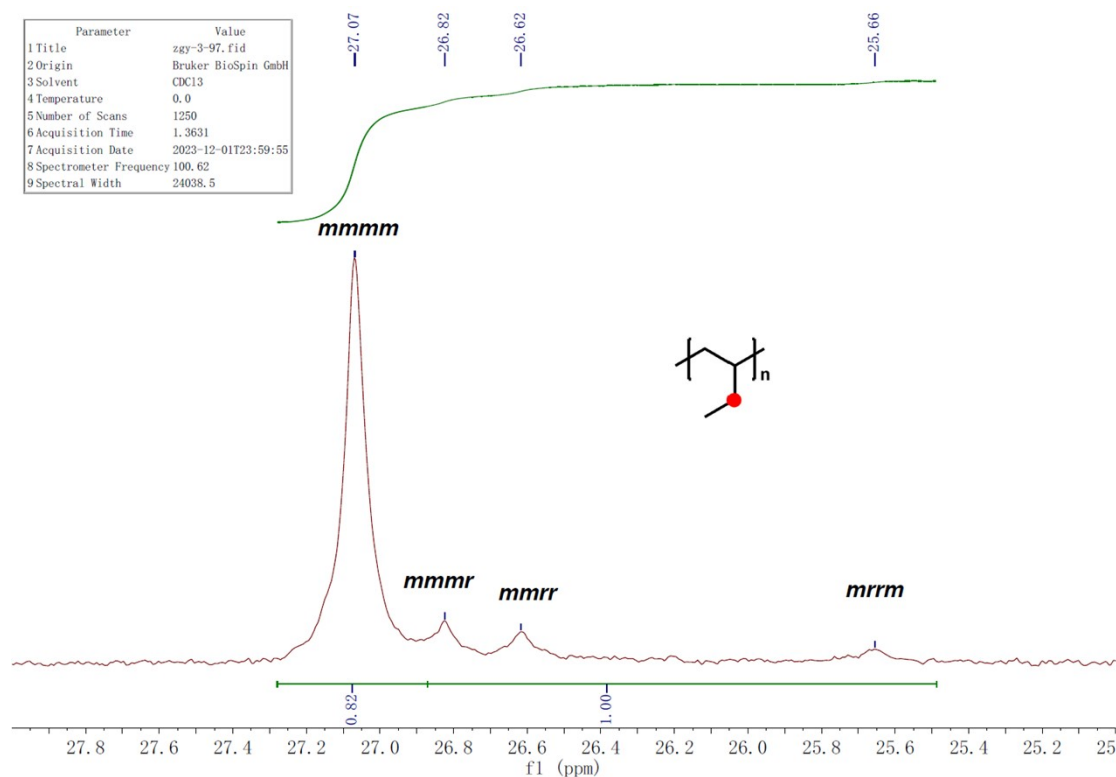

**Figure S26.** Quantitative  $^{13}\text{C}$  NMR spectrum (100 MHz,  $\text{CDCl}_3$ , 298 K) of the poly(1-butene) generated by complex **6e** from Table 2, Entry 8.

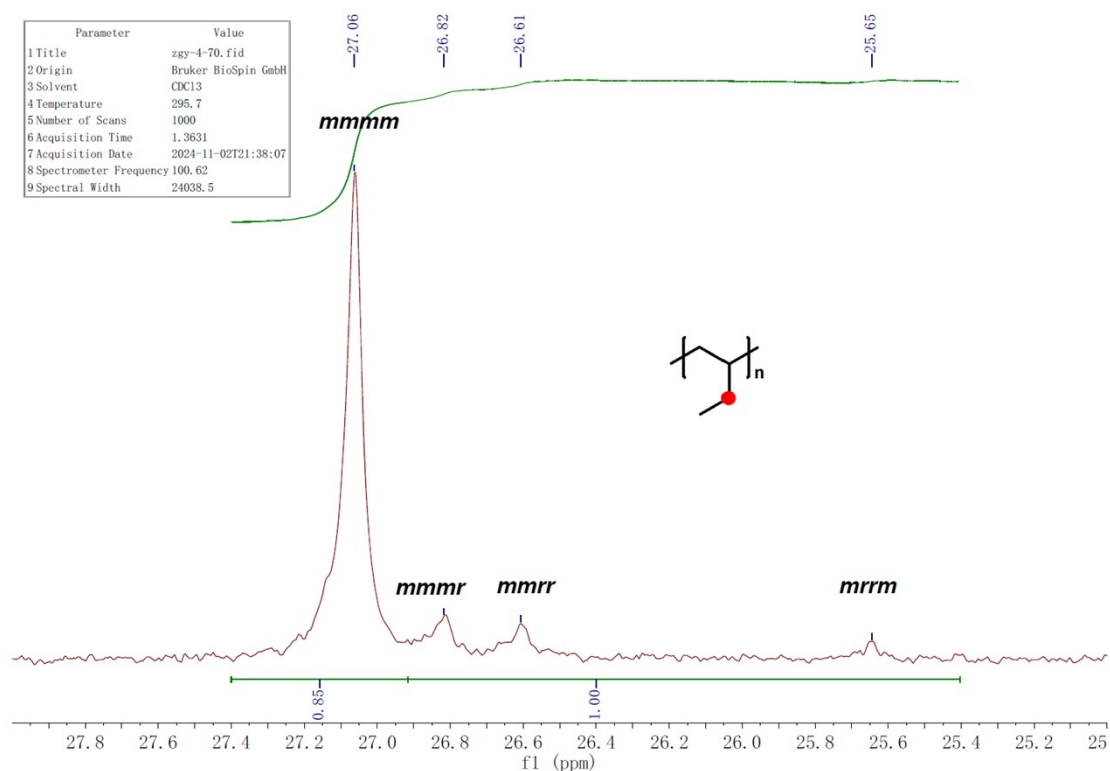

**Figure S27.** Quantitative  $^{13}\text{C}$  NMR spectrum (100 MHz,  $\text{CDCl}_3$ , 298 K) of the poly(1-butene) generated by complex **6e** from Table 2, Entry 9.

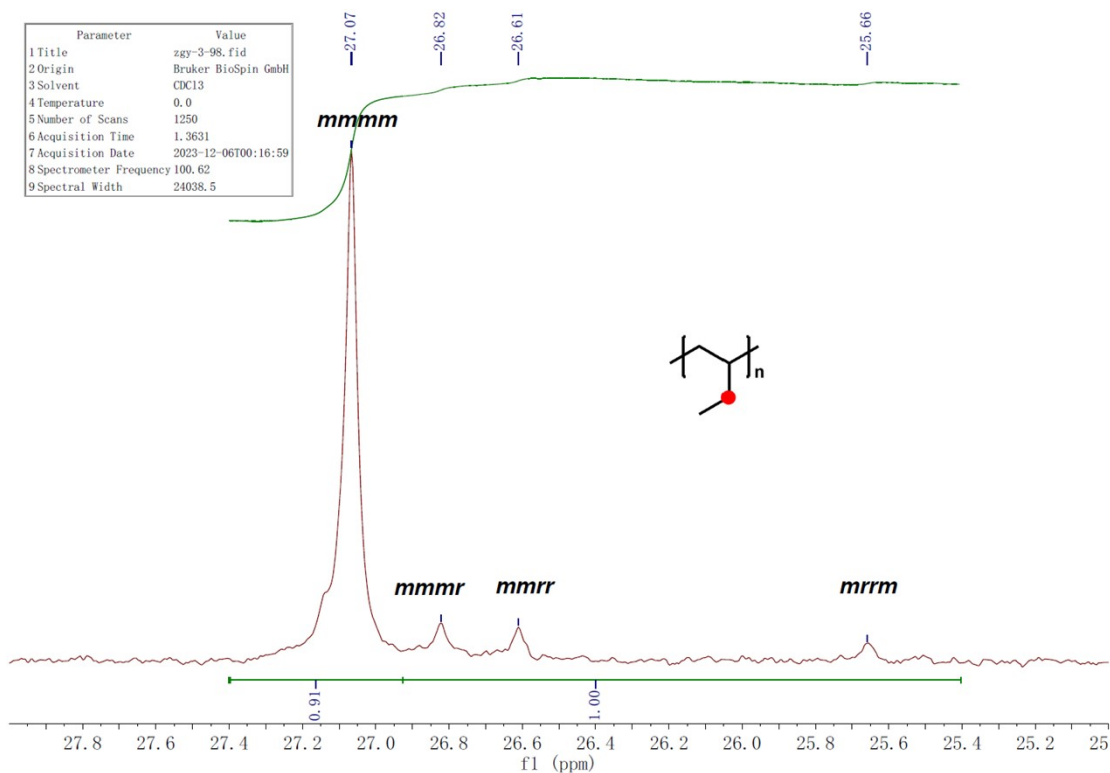

**Figure S28.** Quantitative  $^{13}\text{C}$  NMR spectrum (100 MHz,  $\text{CDCl}_3$ , 298 K) of the poly(1-butene) generated by complex **6e** from Table 2, Entry 10.

## 6. GPC Traces of Polymers

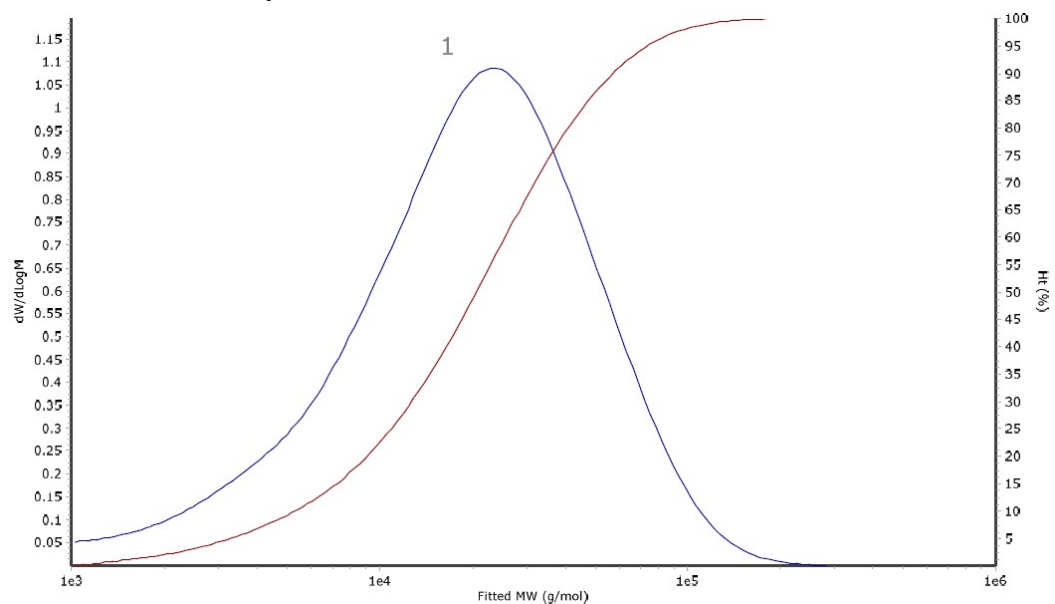

### Molecular Weight Averages

| Peak   | Mp (g/mol) | Mn (g/mol) | Mw (g/mol) | Mz (g/mol) | Mz+1 (g/mol) | Mv (g/mol) | PD    |
|--------|------------|------------|------------|------------|--------------|------------|-------|
| Peak 1 | 23934      | 11483      | 27243      | 48200      | 72798        | 44948      | 2.372 |

### Peak Trace Information

| Peak   | Trace | Peak Max RT (mins) | Peak Area (mV.s) | Peak Height (mV) |
|--------|-------|--------------------|------------------|------------------|
| Peak 1 | RI    | 8.07500            | 351548.910       | 6929.555         |

**Figure S29.** GPC trace of the poly(1-butene) (Table 1, Entry 1).

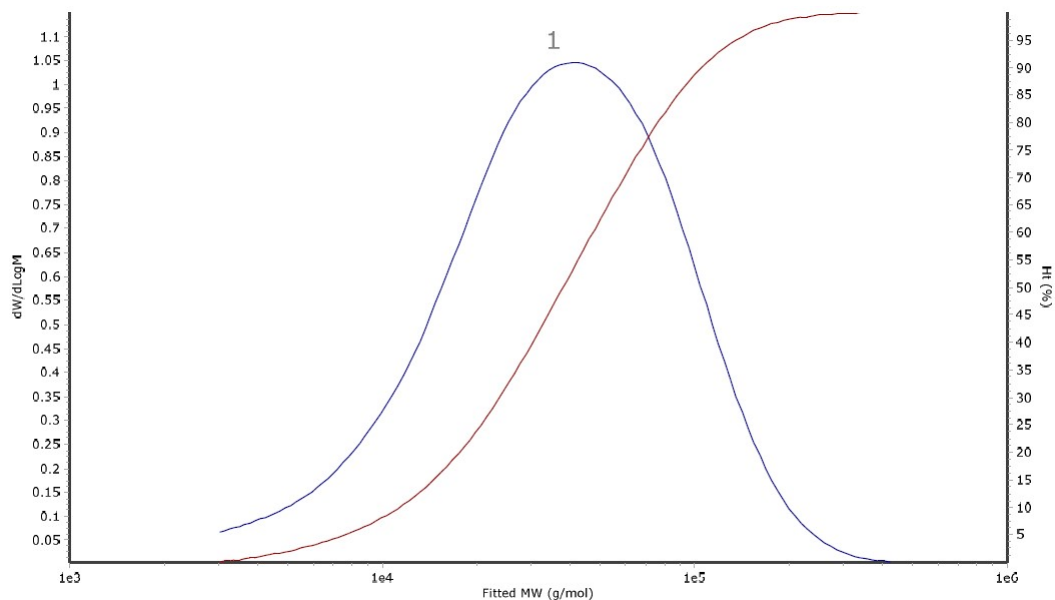

### Molecular Weight Averages

| Peak   | Mp (g/mol) | Mn (g/mol) | Mw (g/mol) | Mz (g/mol) | Mz+1 (g/mol) | Mv (g/mol) | PD    |
|--------|------------|------------|------------|------------|--------------|------------|-------|
| Peak 1 | 42306      | 24202      | 50672      | 88447      | 133780       | 82468      | 2.094 |

### Peak Trace Information

| Peak   | Trace | Peak Max RT (mins) | Peak Area (mV.s) | Peak Height (mV) |
|--------|-------|--------------------|------------------|------------------|
| Peak 1 | RI    | 7.85833            | 378197.804       | 7308.349         |

**Figure S30.** GPC trace of the poly(1-butene) (Table 1, Entry 2).

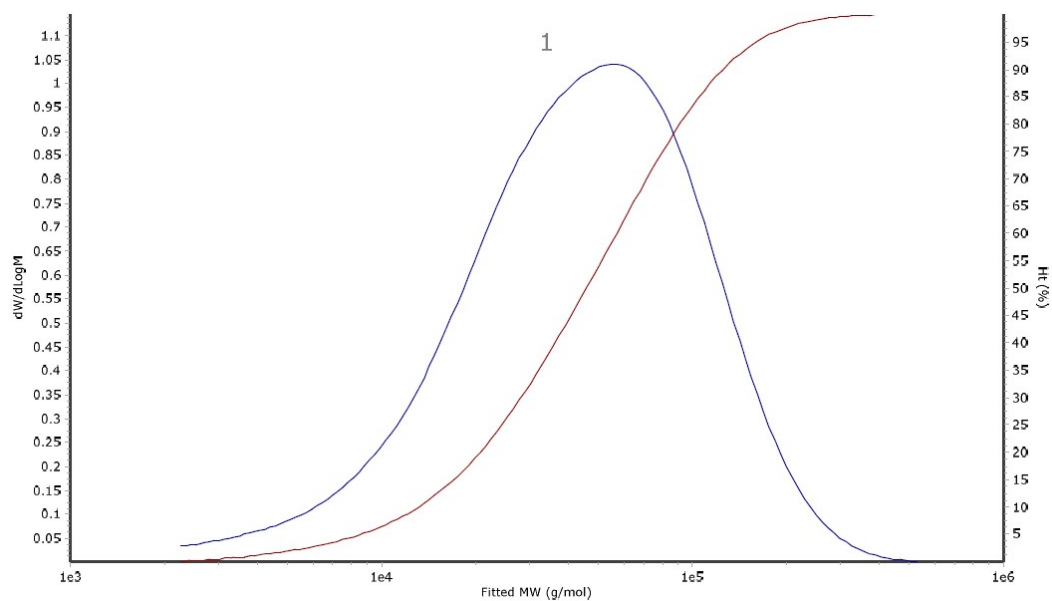

#### Molecular Weight Averages

| Peak   | Mp (g/mol) | Mn (g/mol) | Mw (g/mol) | Mz (g/mol) | Mz+1 (g/mol) | Mv (g/mol) | PD   |
|--------|------------|------------|------------|------------|--------------|------------|------|
| Peak 1 | 57070      | 27147      | 60277      | 104590     | 156117       | 97723      | 2.22 |

#### Peak Trace Information

| Peak   | Trace | Peak Max RT (mins) | Peak Area (mV.s) | Peak Height (mV) |
|--------|-------|--------------------|------------------|------------------|
| Peak 1 | RI    | 7.74167            | 750497.712       | 14548.597        |

**Figure S31.** GPC trace of the poly(1-butene) (Table 1, Entry 3).

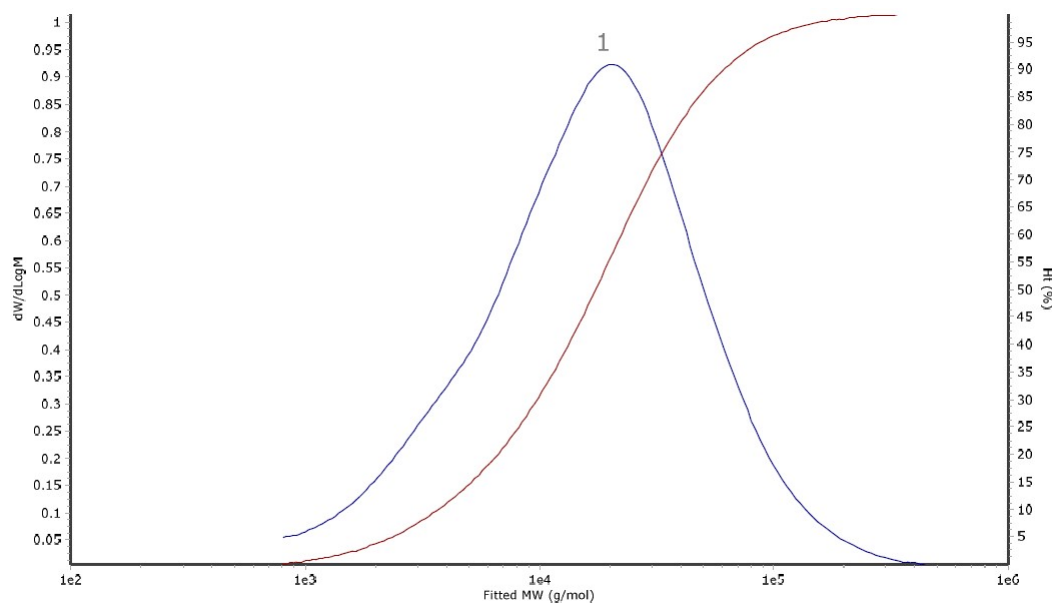

#### Molecular Weight Averages

| Peak   | Mp (g/mol) | Mn (g/mol) | Mw (g/mol) | Mz (g/mol) | Mz+1 (g/mol) | Mv (g/mol) | PD    |
|--------|------------|------------|------------|------------|--------------|------------|-------|
| Peak 1 | 20688      | 8832       | 27904      | 71935      | 146198       | 63494      | 3.159 |

#### Peak Trace Information

| Peak   | Trace | Peak Max RT (mins) | Peak Area (mV.s) | Peak Height (mV) |
|--------|-------|--------------------|------------------|------------------|
| Peak 1 | RI    | 8.13333            | 560476.615       | 9329.281         |

**Figure S32.** GPC trace of the poly(1-butene) (Table 1, Entry 4).

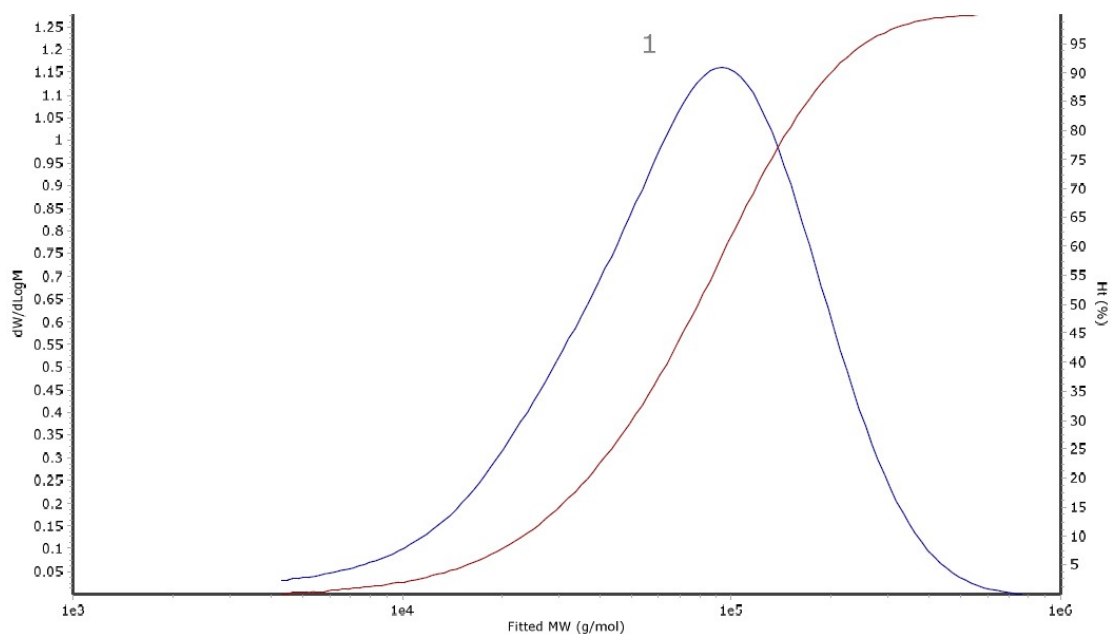

#### Molecular Weight Averages

| Peak   | Mp (g/mol) | Mn (g/mol) | Mw (g/mol) | Mz (g/mol) | Mz+1 (g/mol) | Mv (g/mol) | PD    |
|--------|------------|------------|------------|------------|--------------|------------|-------|
| Peak 1 | 93749      | 48515      | 99528      | 162985     | 233765       | 153353     | 2.051 |

#### Peak Trace Information

| Peak   | Trace | Peak Max RT (mins) | Peak Area (mV.s) | Peak Height (mV) |
|--------|-------|--------------------|------------------|------------------|
| Peak 1 | RI    | 7.54167            | 353117.368       | 7723.577         |

**Figure S33.** GPC trace of the poly(1-butene) (Table 1, Entry 5).

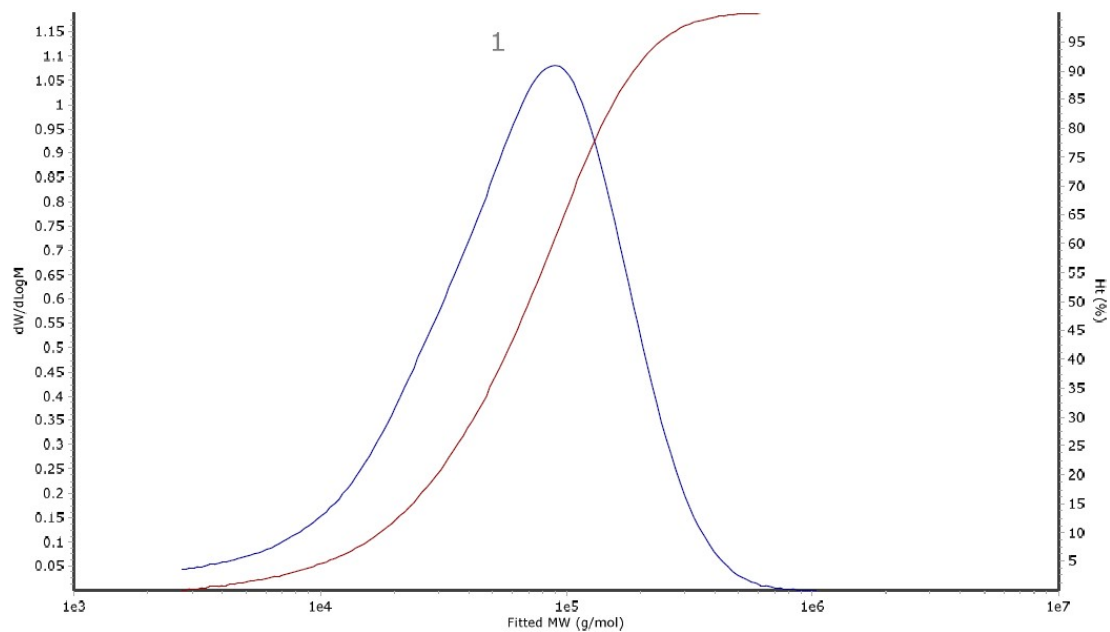

#### Molecular Weight Averages

| Peak   | Mp (g/mol) | Mn (g/mol) | Mw (g/mol) | Mz (g/mol) | Mz+1 (g/mol) | Mv (g/mol) | PD    |
|--------|------------|------------|------------|------------|--------------|------------|-------|
| Peak 1 | 89772      | 36926      | 91137      | 159272     | 240239       | 148804     | 2.468 |

#### Peak Trace Information

| Peak   | Trace | Peak Max RT (mins) | Peak Area (mV.s) | Peak Height (mV) |
|--------|-------|--------------------|------------------|------------------|
| Peak 1 | RI    | 7.56667            | 477069.830       | 9706.252         |

**Figure S34.** GPC trace of the poly(1-butene) (Table 1, Entry 6).

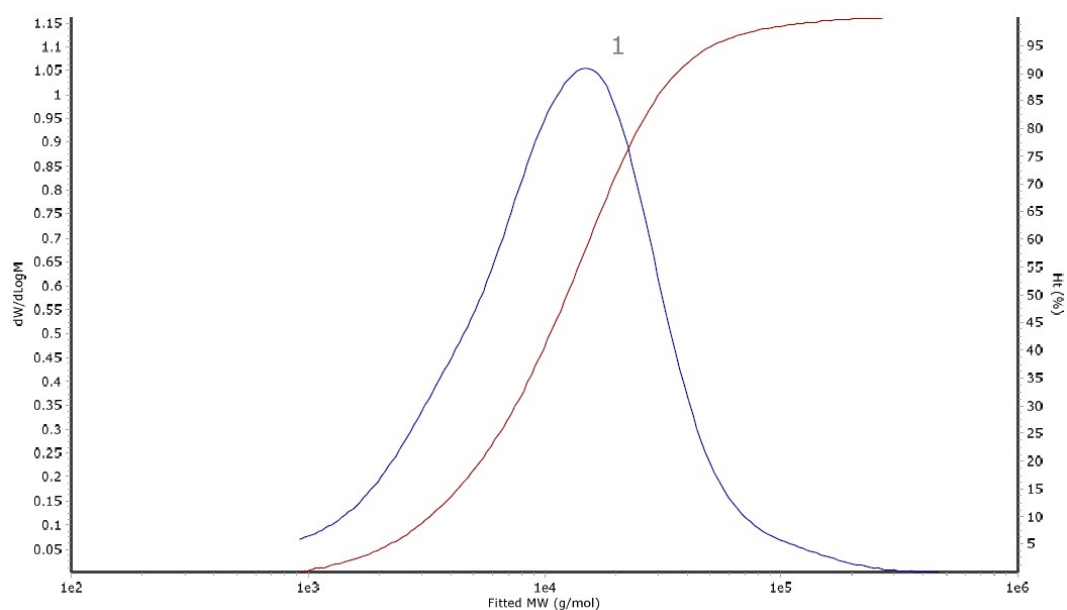

#### Molecular Weight Averages

| Peak   | Mp (g/mol) | Mn (g/mol) | Mw (g/mol) | Mz (g/mol) | Mz+1 (g/mol) | Mv (g/mol) | PD    |
|--------|------------|------------|------------|------------|--------------|------------|-------|
| Peak 1 | 15498      | 7445       | 18514      | 49726      | 128548       | 42435      | 2.487 |

#### Peak Trace Information

| Peak   | Trace | Peak Max RT (mins) | Peak Area (mV.s) | Peak Height (mV) |
|--------|-------|--------------------|------------------|------------------|
| Peak 1 | RI    | 8.25833            | 444656.094       | 8344.652         |

**Figure S35.** GPC trace of the poly(1-butene) (Table 1, Entry 7).

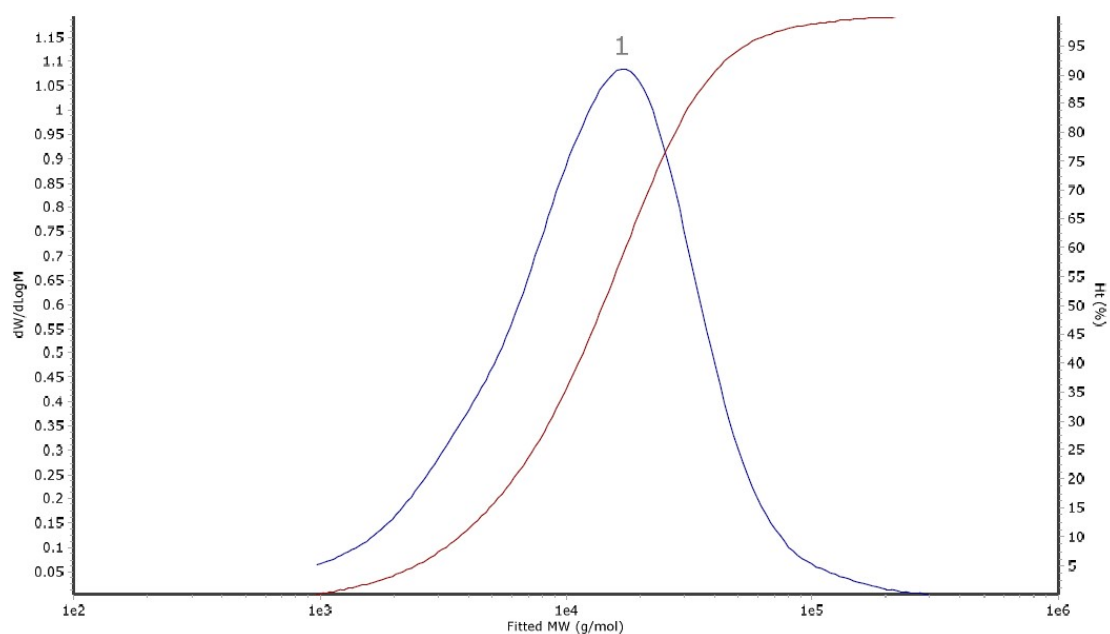

#### Molecular Weight Averages

| Peak   | Mp (g/mol) | Mn (g/mol) | Mw (g/mol) | Mz (g/mol) | Mz+1 (g/mol) | Mv (g/mol) | PD    |
|--------|------------|------------|------------|------------|--------------|------------|-------|
| Peak 1 | 17532      | 8314       | 19653      | 42933      | 89128        | 38181      | 2.364 |

#### Peak Trace Information

| Peak   | Trace | Peak Max RT (mins) | Peak Area (mV.s) | Peak Height (mV) |
|--------|-------|--------------------|------------------|------------------|
| Peak 1 | RI    | 8.20833            | 493998.433       | 9581.289         |

**Figure S36.** GPC trace of the poly(1-butene) (Table 1, Entry 8).



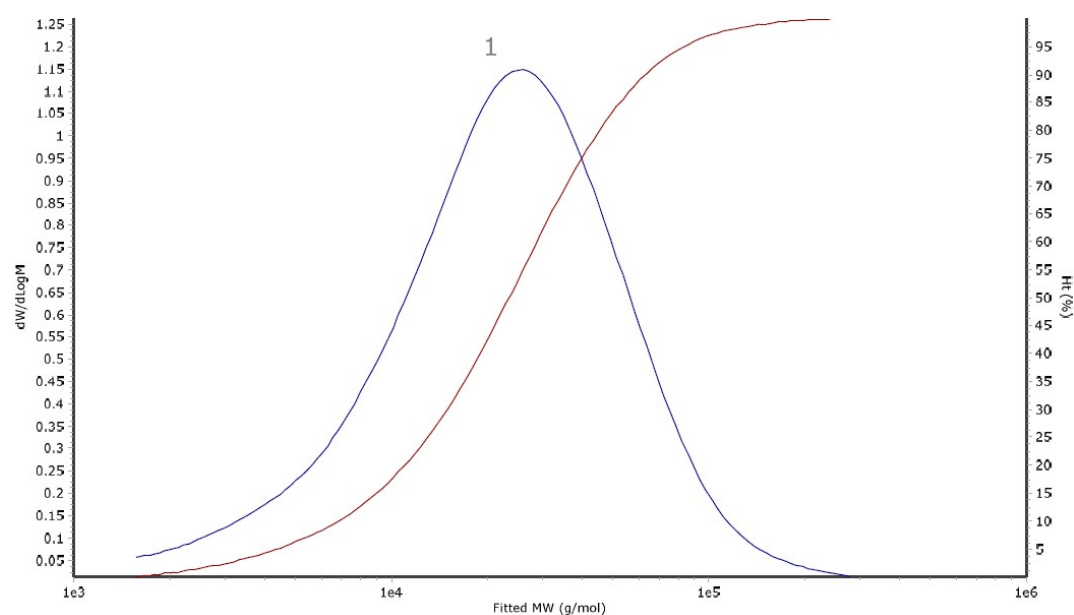

#### Molecular Weight Averages

| Peak   | Mp (g/mol) | Mn (g/mol) | Mw (g/mol) | Mz (g/mol) | Mz+1 (g/mol) | Mv (g/mol) | PD    |
|--------|------------|------------|------------|------------|--------------|------------|-------|
| Peak 1 | 26023      | 14407      | 31255      | 57692      | 96307        | 53057      | 2.169 |

#### Peak Trace Information

| Peak   | Trace | Peak Max RT (mins) | Peak Area (mV.s) | Peak Height (mV) |
|--------|-------|--------------------|------------------|------------------|
| Peak 1 | RI    | 8.04167            | 439712.869       | 9187.797         |

**Figure S37.** GPC trace of the poly(1-butene) (Table 1, Entry 9).

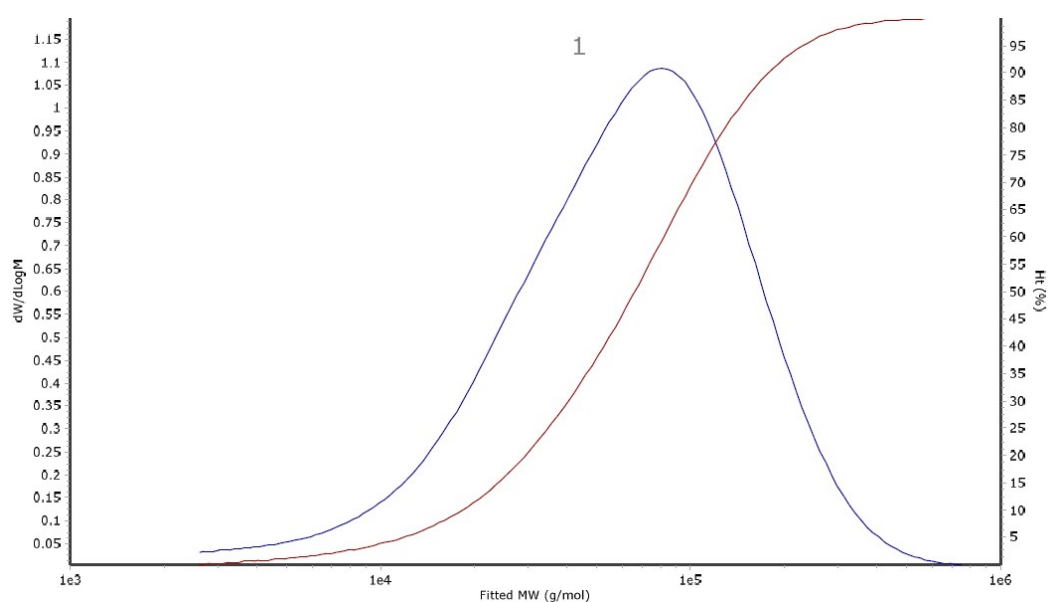

#### Molecular Weight Averages

| Peak   | Mp (g/mol) | Mn (g/mol) | Mw (g/mol) | Mz (g/mol) | Mz+1 (g/mol) | Mv (g/mol) | PD    |
|--------|------------|------------|------------|------------|--------------|------------|-------|
| Peak 1 | 82325      | 37541      | 86255      | 150745     | 228960       | 140580     | 2.298 |

#### Peak Trace Information

| Peak   | Trace | Peak Max RT (mins) | Peak Area (mV.s) | Peak Height (mV) |
|--------|-------|--------------------|------------------|------------------|
| Peak 1 | RI    | 7.60000            | 505034.052       | 10313.134        |

**Figure S38.** GPC trace of the poly(1-butene) (Table 1, Entry 10 or Table 2, Entry 1).



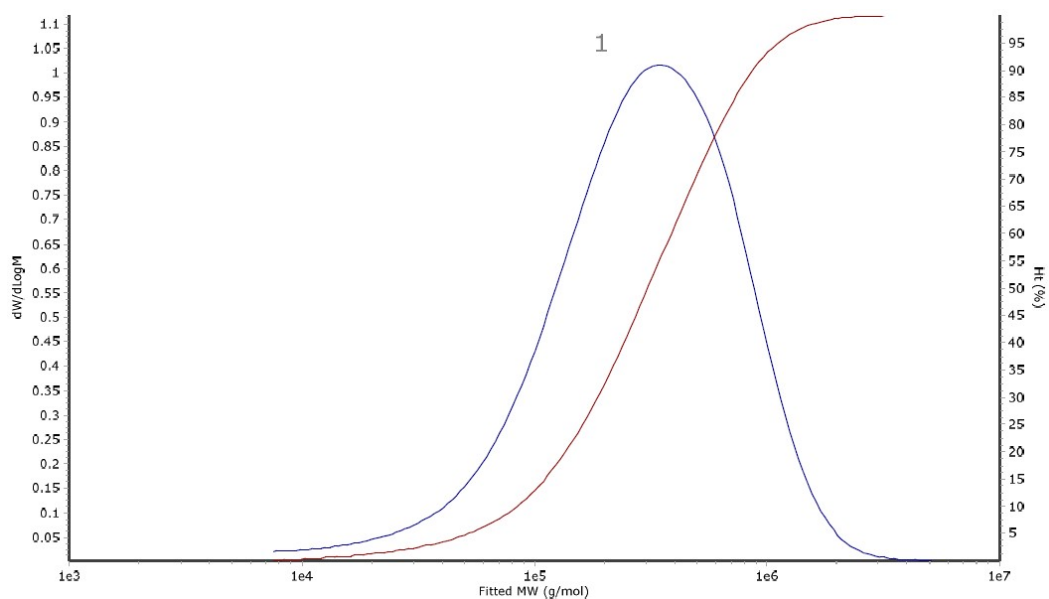

#### Molecular Weight Averages

| Peak   | Mp (g/mol) | Mn (g/mol) | Mw (g/mol) | Mz (g/mol) | Mz+1 (g/mol) | Mv (g/mol) | PD    |
|--------|------------|------------|------------|------------|--------------|------------|-------|
| Peak 1 | 347450     | 163152     | 415028     | 754216     | 1214197      | 698860     | 2.544 |

#### Peak Trace Information

| Peak   | Trace | Peak Max RT (mins) | Peak Area (mV.s) | Peak Height (mV) |
|--------|-------|--------------------|------------------|------------------|
| Peak 1 | RI    | 7.05000            | 665983.959       | 12872.983        |

**Figure S39.** GPC trace of the poly(1-butene) (Table 1, Entry 11).

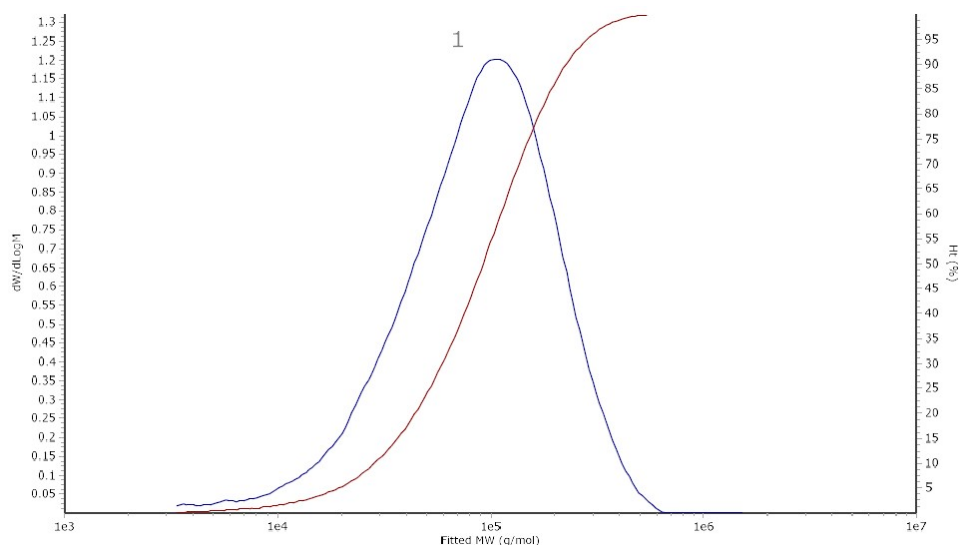

#### Molecular Weight Averages

| Peak   | Mp (g/mol) | Mn (g/mol) | Mw (g/mol) | Mz (g/mol) | Mz+1 (g/mol) | Mv (g/mol) |
|--------|------------|------------|------------|------------|--------------|------------|
| Peak 1 | 107381     | 56869      | 114686     | 179699     | 246039       | 105975     |
| PD     | 2.017      |            |            |            |              |            |

#### Peak Trace Information

| Peak             | Trace | Peak Max RT (mins) | Peak Area (mV.s) |
|------------------|-------|--------------------|------------------|
| Peak 1           | RI    | 7.49520            | 4491.969         |
| Peak Height (mV) |       | 96.827             |                  |

**Figure S40.** GPC trace of the poly(1-butene) (Table 2, Entry 2).

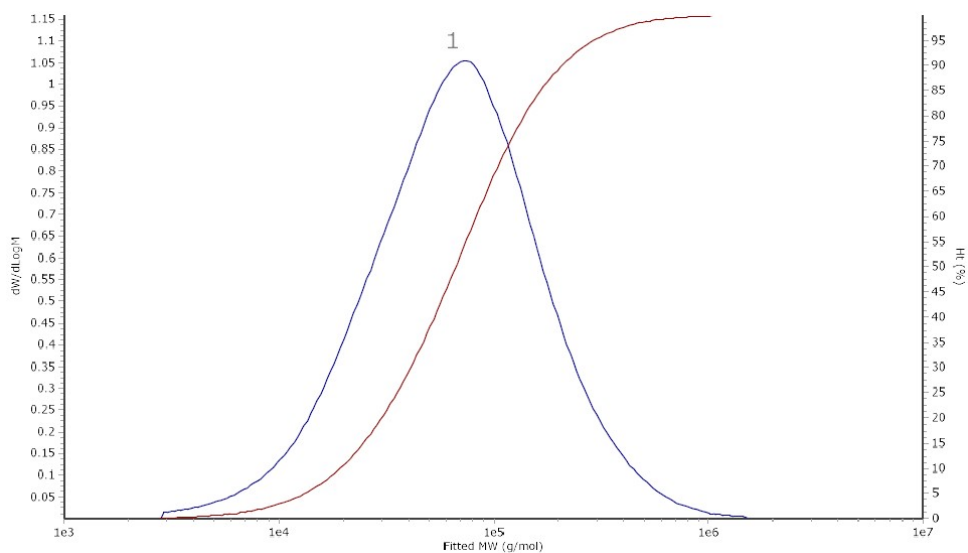

**Molecular Weight Averages**

| Peak   | Mp (g/mol) | Mn (g/mol) | Mw (g/mol) | Mz (g/mol) | Mz+1 (g/mol) | Mv (g/mol) |
|--------|------------|------------|------------|------------|--------------|------------|
| Peak 1 | 72519      | 41320      | 99663      | 222916     | 438465       | 87974      |
| PD     |            |            |            |            |              |            |
|        | 2.412      |            |            |            |              |            |

**Peak Trace Information**

| Peak             | Trace | Peak Max RT (mins) | Peak Area (mV.s) |
|------------------|-------|--------------------|------------------|
| Peak 1           | RI    | 7.65360            | 31776.258        |
| Peak Height (mV) |       |                    |                  |
|                  |       | 600.650            |                  |

**Figure S41.** GPC trace of the poly(1-butene) (Table 2, Entry 5).

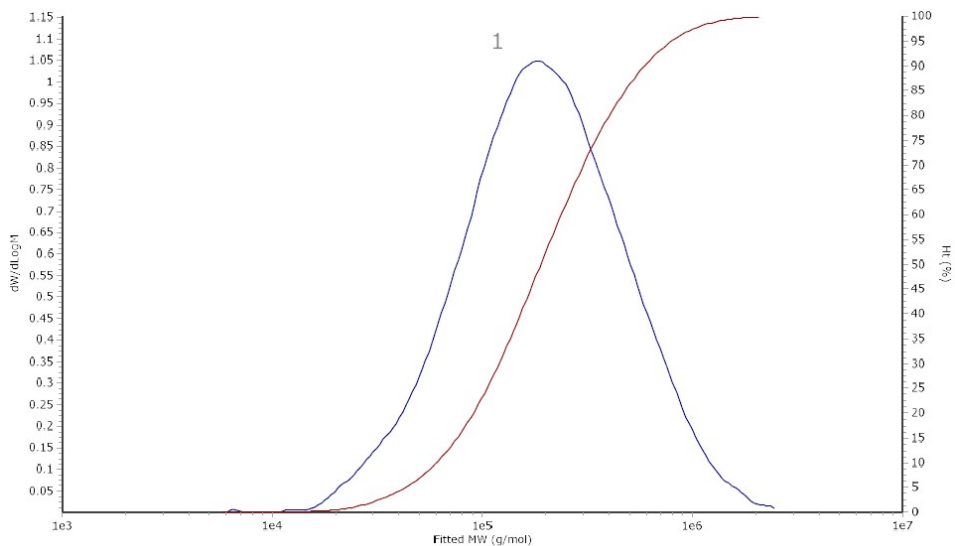

**Molecular Weight Averages**

| Peak   | Mp (g/mol) | Mn (g/mol) | Mw (g/mol) | Mz (g/mol) | Mz+1 (g/mol) | Mv (g/mol) |
|--------|------------|------------|------------|------------|--------------|------------|
| Peak 1 | 180152     | 129268     | 276827     | 536997     | 876364       | 248341     |
| PD     |            |            |            |            |              |            |
|        | 2.141      |            |            |            |              |            |

**Peak Trace Information**

| Peak             | Trace | Peak Max RT (mins) | Peak Area (mV.s) |
|------------------|-------|--------------------|------------------|
| Peak 1           | RI    | 7.28640            | 4092.683         |
| Peak Height (mV) |       |                    |                  |
|                  |       | 76.978             |                  |

**Figure S42.** GPC trace of the poly(1-butene) (Table 2, Entry 6).

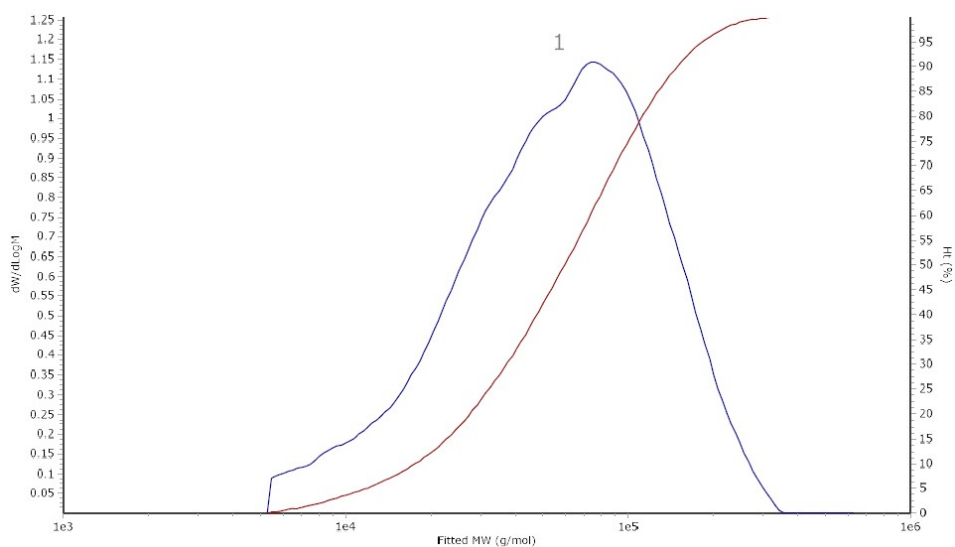

**Molecular Weight Averages**

| Peak   | Mp (g/mol) | Mn (g/mol) | Mw (g/mol) | Mz (g/mol) | Mz+1 (g/mol) | Mv (g/mol) |
|--------|------------|------------|------------|------------|--------------|------------|
| Peak 1 | 73825      | 38085      | 73867      | 114647     | 152012       | 68227      |
| PD     |            |            |            |            |              |            |
|        | 1.94       |            |            |            |              |            |

**Peak Trace Information**

| Peak             | Trace | Peak Max RT (mins) | Peak Area (mV.s) |
|------------------|-------|--------------------|------------------|
| Peak 1           | RI    | 7.64640            | 1882.094         |
| Peak Height (mV) |       |                    |                  |
|                  |       | 38.592             |                  |

**Figure S43.** GPC trace of the poly(1-butene) (Table 2, Entry 7).

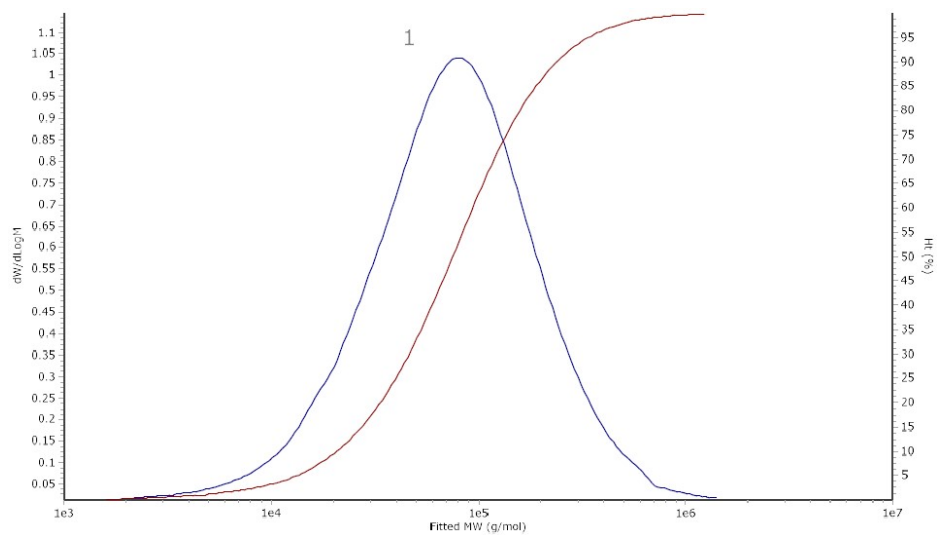

**Molecular Weight Averages**

| Peak   | Mp (g/mol) | Mn (g/mol) | Mw (g/mol) | Mz (g/mol) | Mz+1 (g/mol) | Mv (g/mol) |
|--------|------------|------------|------------|------------|--------------|------------|
| Peak 1 | 79286      | 40990      | 114611     | 266912     | 526811       | 100424     |
| PD     |            |            |            |            |              |            |
|        | 2.796      |            |            |            |              |            |

**Peak Trace Information**

| Peak             | Trace | Peak Max RT (mins) | Peak Area (mV.s) |
|------------------|-------|--------------------|------------------|
| Peak 1           | RI    | 7.61760            | 28014.612        |
| Peak Height (mV) |       |                    |                  |
|                  |       | 522.960            |                  |

**Figure S44.** GPC trace of the poly(1-butene) (Table 2, Entry 8).

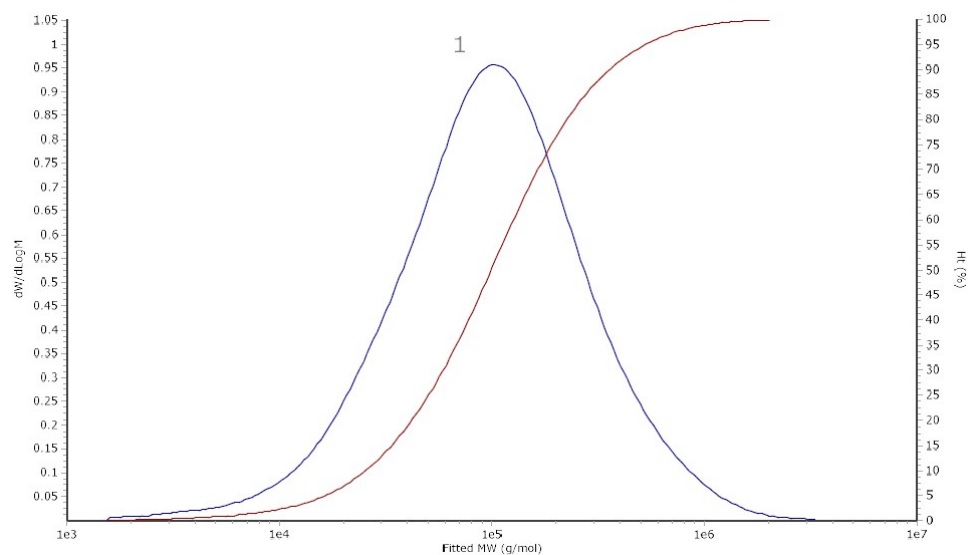

**Molecular Weight Averages**

| Peak   | Mp (g/mol) | Mn (g/mol) | Mw (g/mol) | Mz (g/mol) | Mz+1 (g/mol) | Mv (g/mol) |
|--------|------------|------------|------------|------------|--------------|------------|
| Peak 1 | 101784     | 52037      | 164707     | 438202     | 932865       | 141116     |
| PD     |            |            |            |            |              |            |
|        | 3.165      |            |            |            |              |            |

**Peak Trace Information**

| Peak             | Trace | Peak Max RT (mins) | Peak Area (mV.s) |
|------------------|-------|--------------------|------------------|
| Peak 1           | RI    | 7.51680            | 28152.151        |
| Peak Height (mV) |       |                    |                  |
|                  |       | 483.387            |                  |

**Figure S45.** GPC trace of the poly(1-butene) (Table 2, Entry 9).

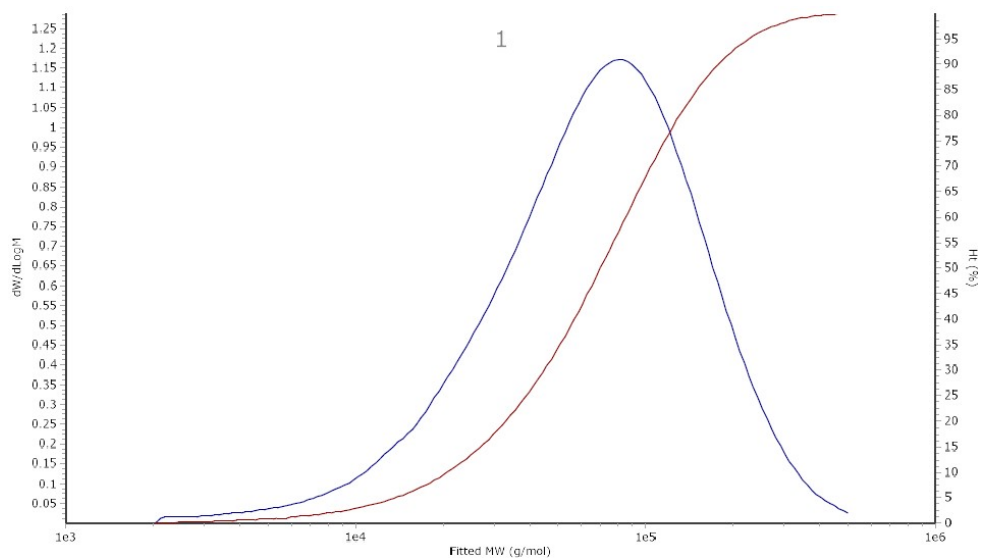

**Molecular Weight Averages**

| Peak   | Mp (g/mol) | Mn (g/mol) | Mw (g/mol) | Mz (g/mol) | Mz+1 (g/mol) | Mv (g/mol) |
|--------|------------|------------|------------|------------|--------------|------------|
| Peak 1 | 80713      | 41615      | 88821      | 144784     | 204797       | 81553      |
| PD     |            |            |            |            |              |            |
|        | 2.134      |            |            |            |              |            |

**Peak Trace Information**

| Peak             | Trace | Peak Max RT (mins) | Peak Area (mV.s) |
|------------------|-------|--------------------|------------------|
| Peak 1           | RI    | 7.61040            | 39335.392        |
| Peak Height (mV) |       |                    |                  |
|                  |       | 826.638            |                  |

**Figure S46.** GPC trace of the poly(1-butene) (Table 2, Entry 10).

## 7. DSC Data of Polymers

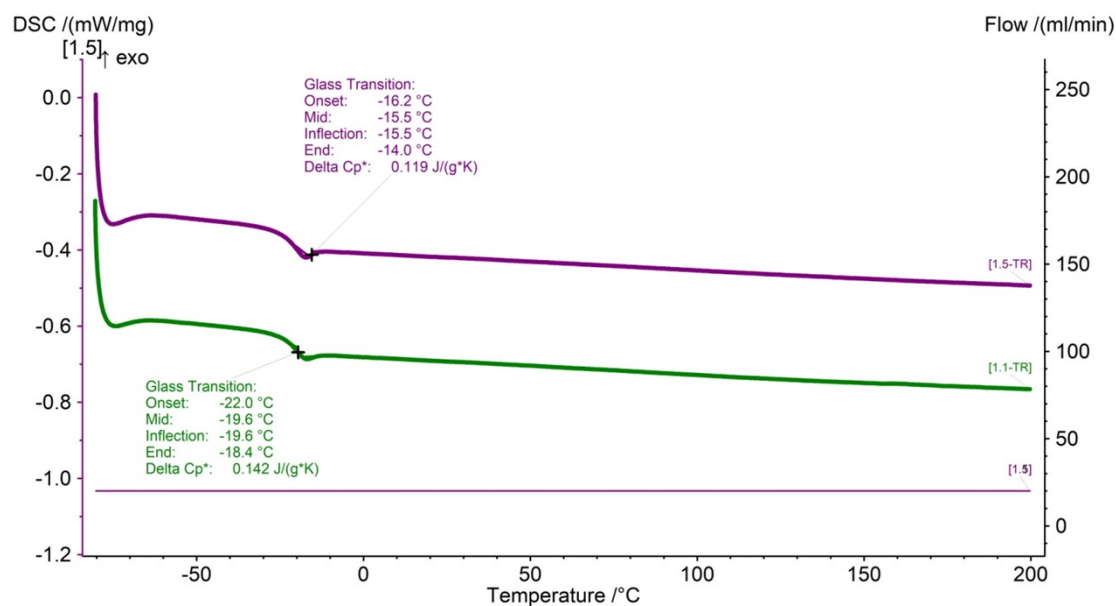

**Figure S47.** DSC data of the poly(1-butene) (Table 1, Entry 10 or Table 2, Entry 1).

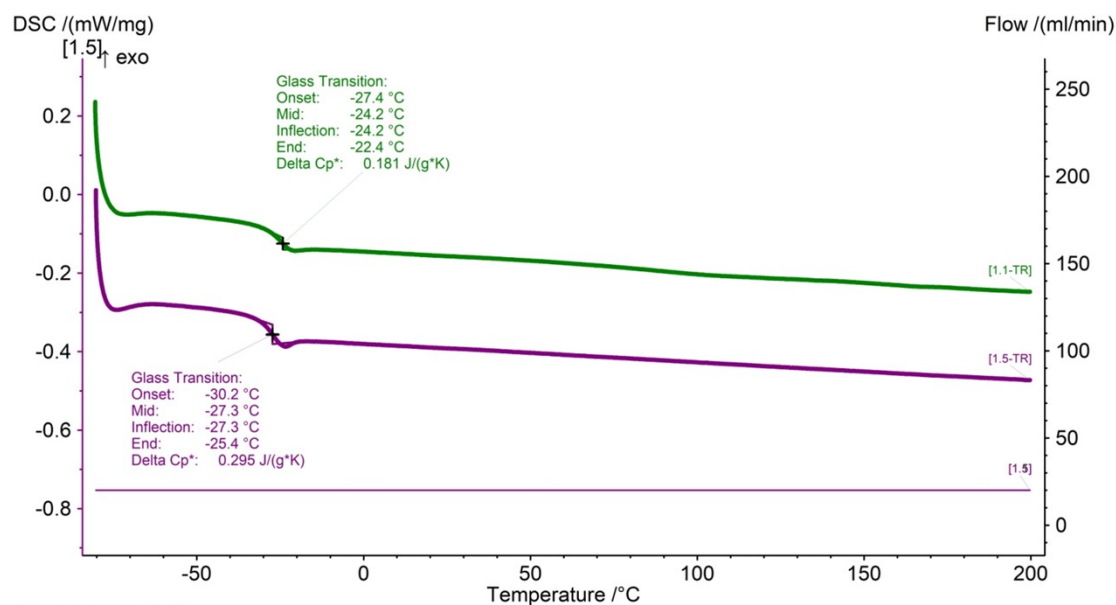

**Figure S48.** DSC data of the poly(1-butene) (Table 2, Entry 2).

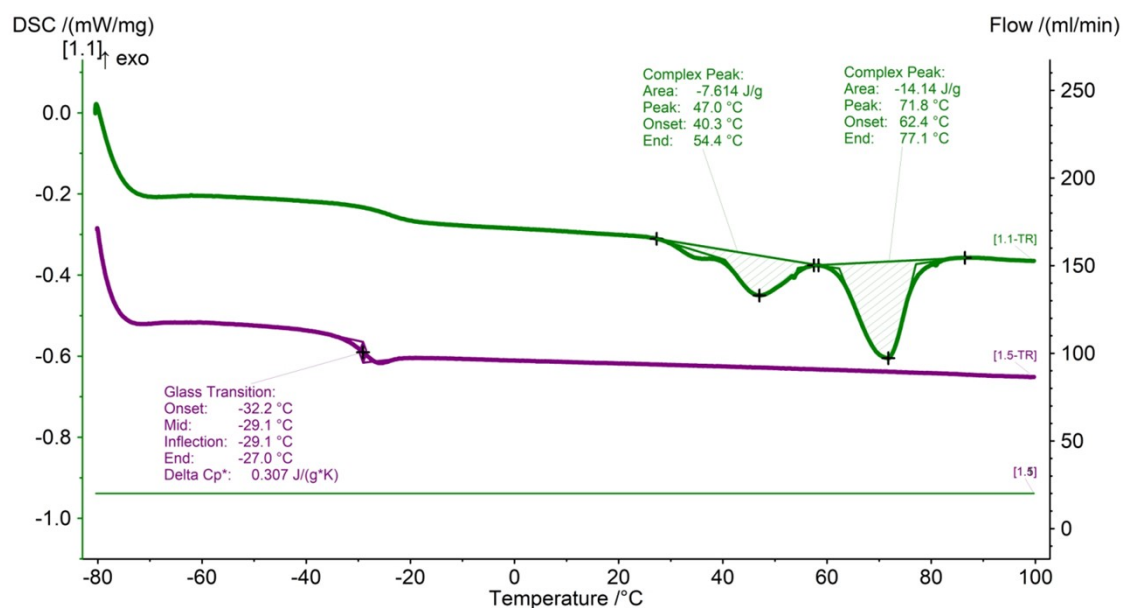

**Figure S49.** DSC data of the poly(1-butene) (Table 2, Entry 5).

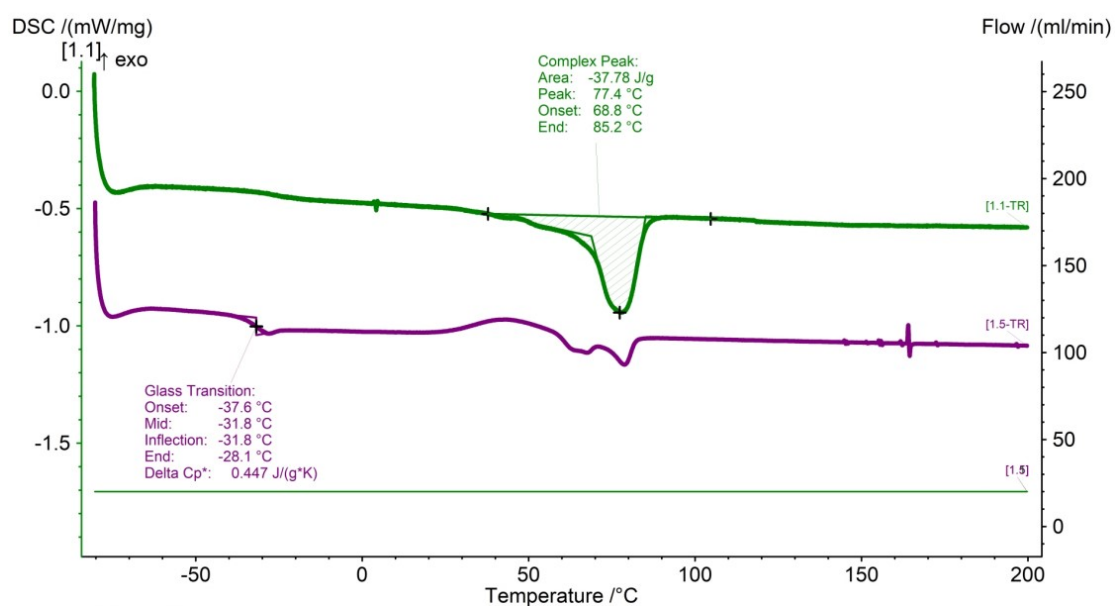

**Figure S50.** DSC data of the poly(1-butene) (Table 2, Entry 8).

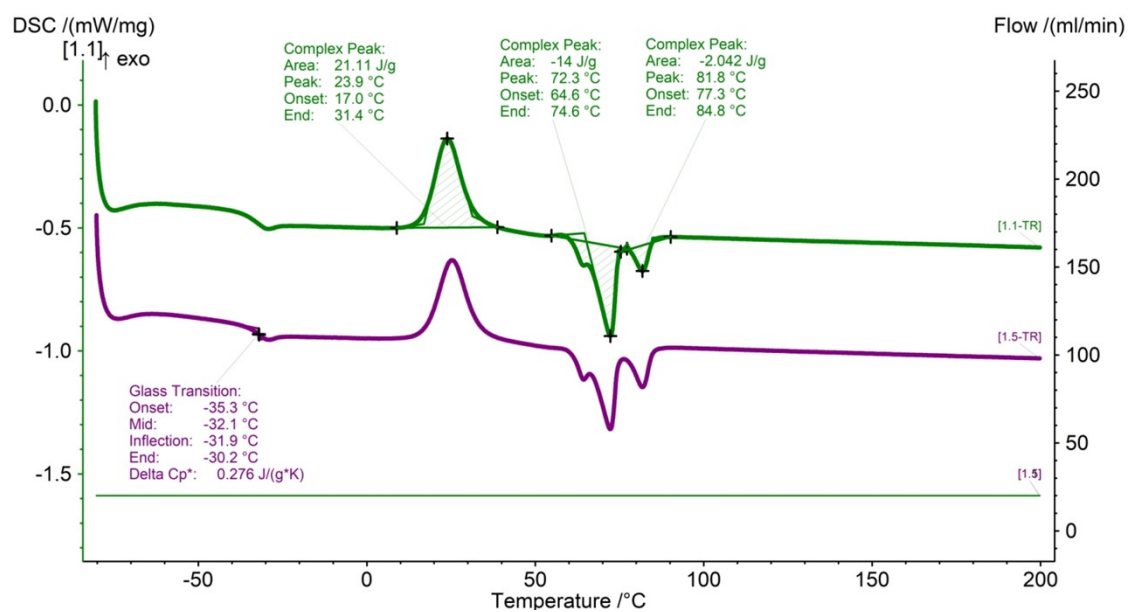

**Figure S51.** DSC data of the poly(1-butene) (Table 2, Entry 10).

## 8. WAXD data of Polymers

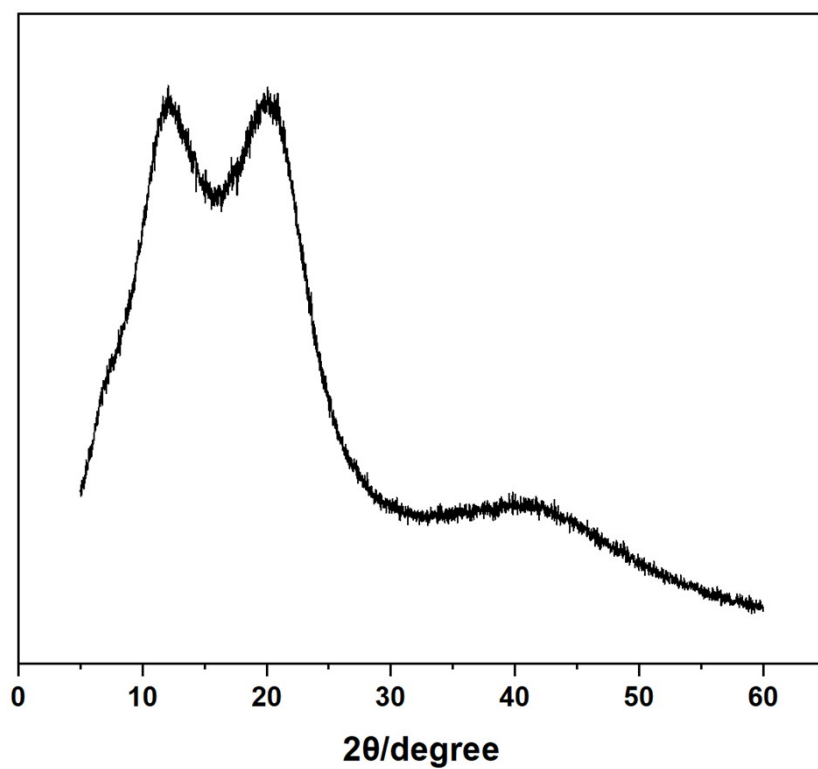

**Figure S52.** The WAXD spectrum of the poly(1-butene) (Table 1, Entry 10 or Table 2, Entry 1).

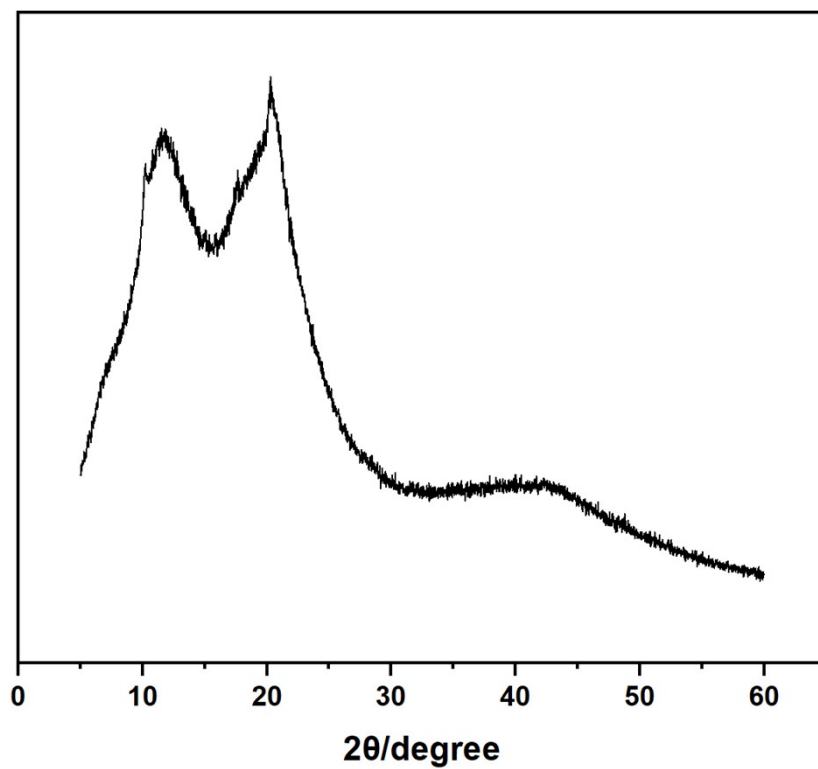

**Figure S53.** The WAXD spectrum of the poly(1-butene) (Table 2, Entry 2).



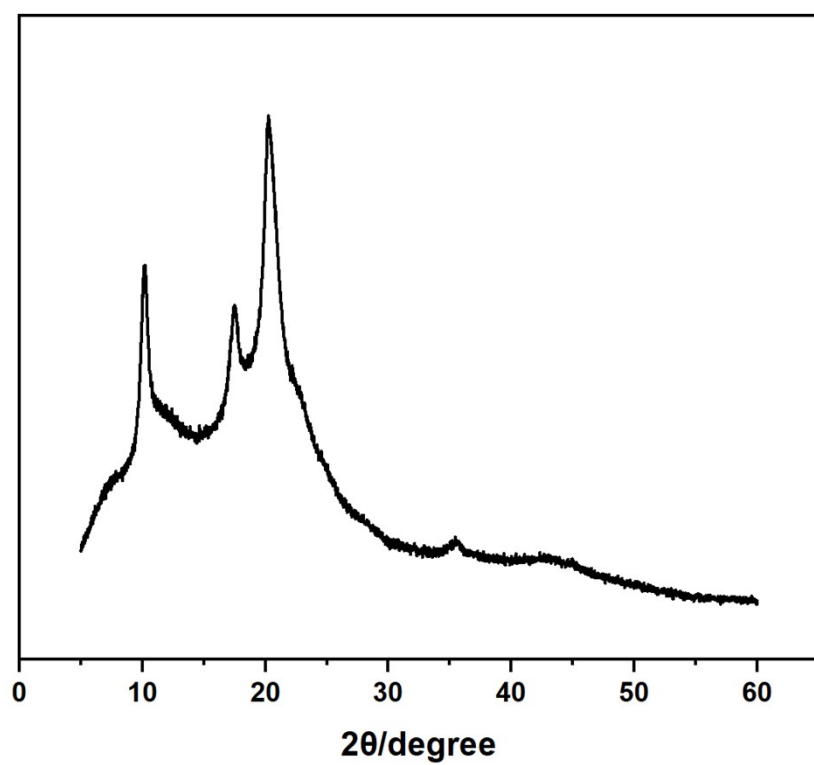

**Figure S54.** The WAXD spectrum of the poly(1-butene) (Table 2, Entry 5).

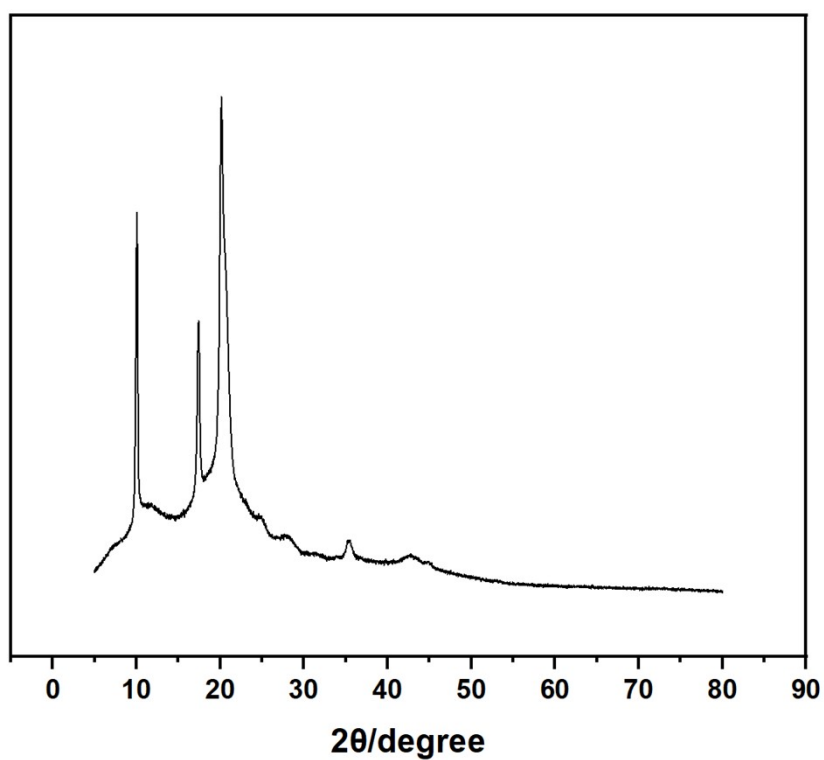

**Figure S55.** The WAXD spectrum of the poly(1-butene) (Table 2, Entry 8).

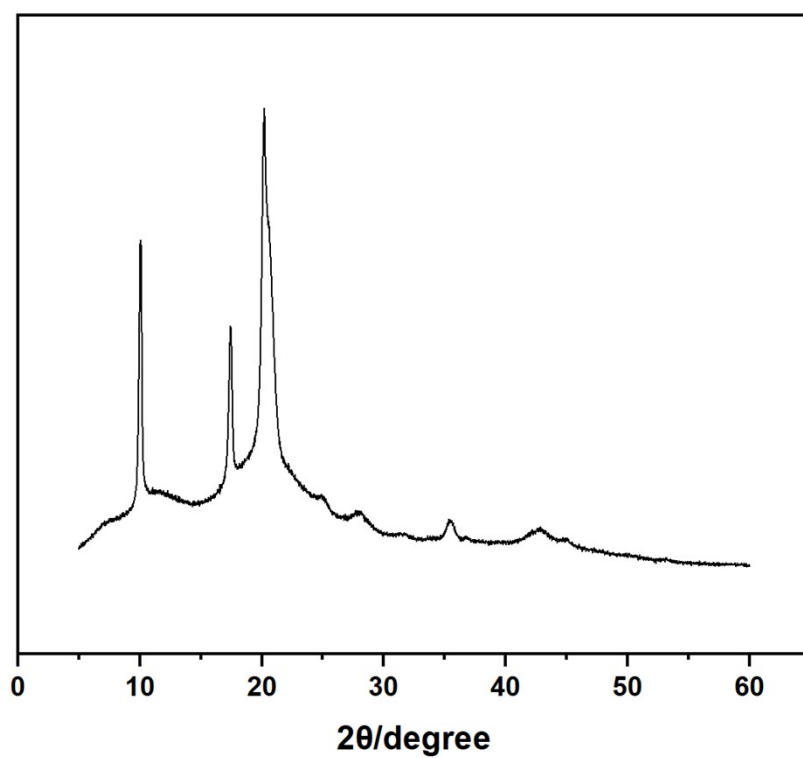

**Figure S56.** The WAXD spectrum of the poly(1-butene) (Table 2, Entry 10).

## 9. Tensile-tests of Polymers

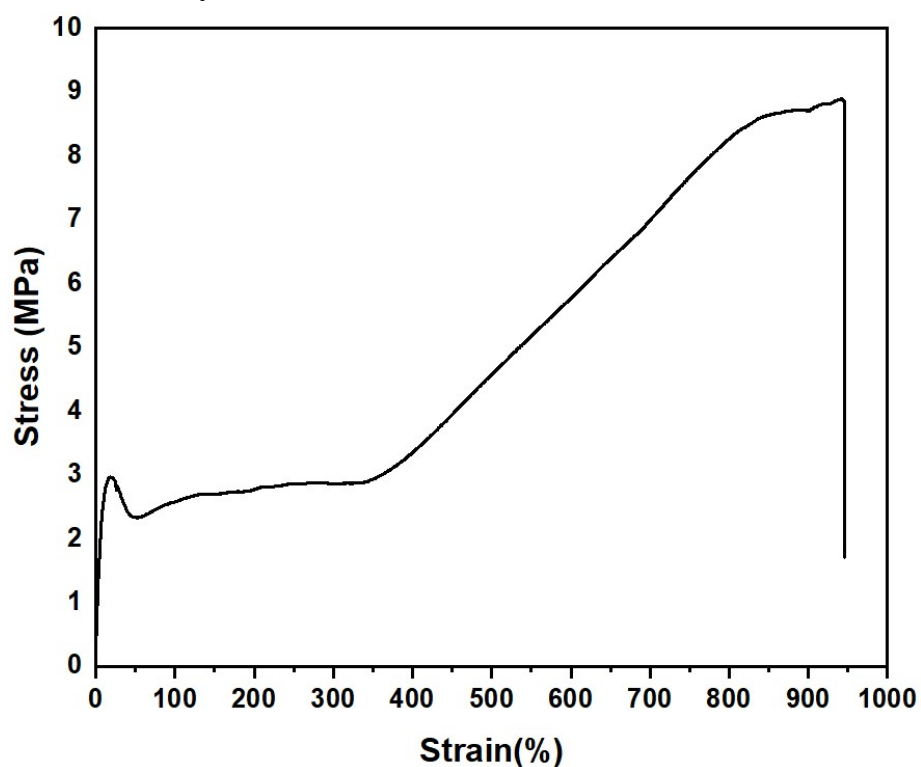

**Figure S57.** Tensile stress-strain curves for poly(1-butene) (Table 2, Entry 5). Yield stress = 2.9 MPa. Stress at break = 8.9 MPa, 946%.

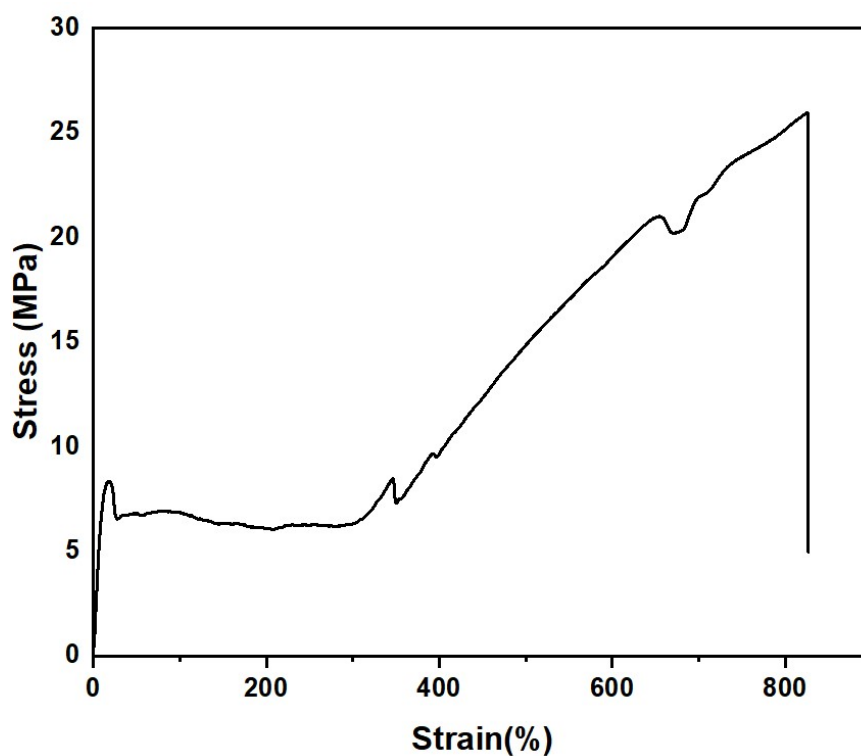

**Figure S58.** Tensile stress-strain curves for poly(1-butene) (Table 2, Entry 8). Yield stress = 8.3 MPa. Stress at break = 26.0 MPa, 837%.

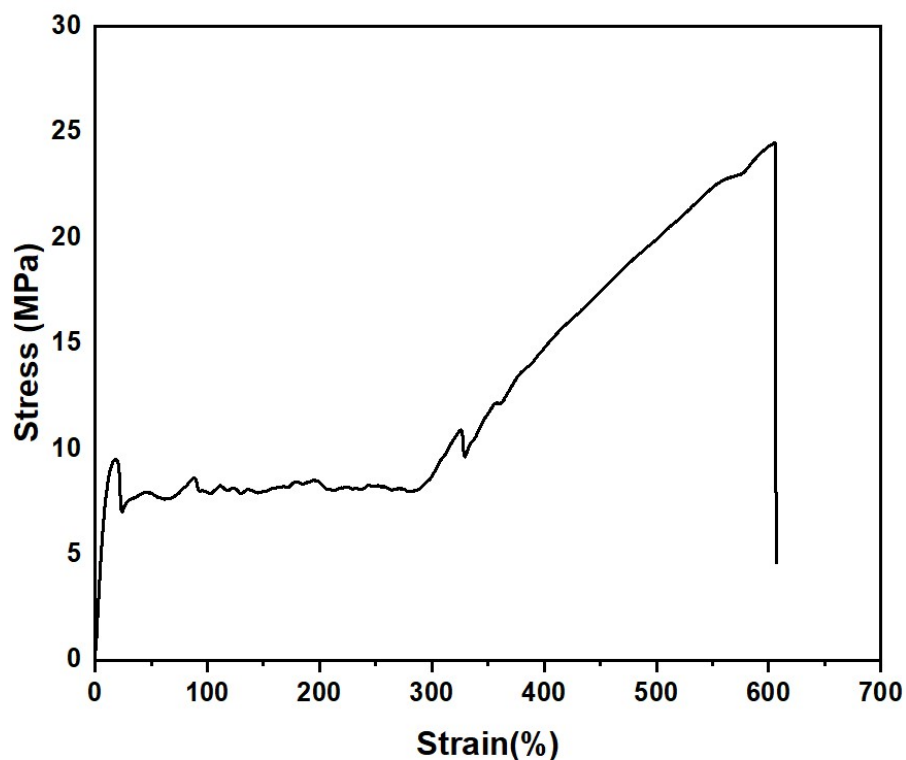

**Figure S59.** Tensile stress-strain curves for poly(1-butene) (Table 2, Entry 10). Yield stress = 9.5 MPa. Stress at break = 20.5 MPa, 513%.

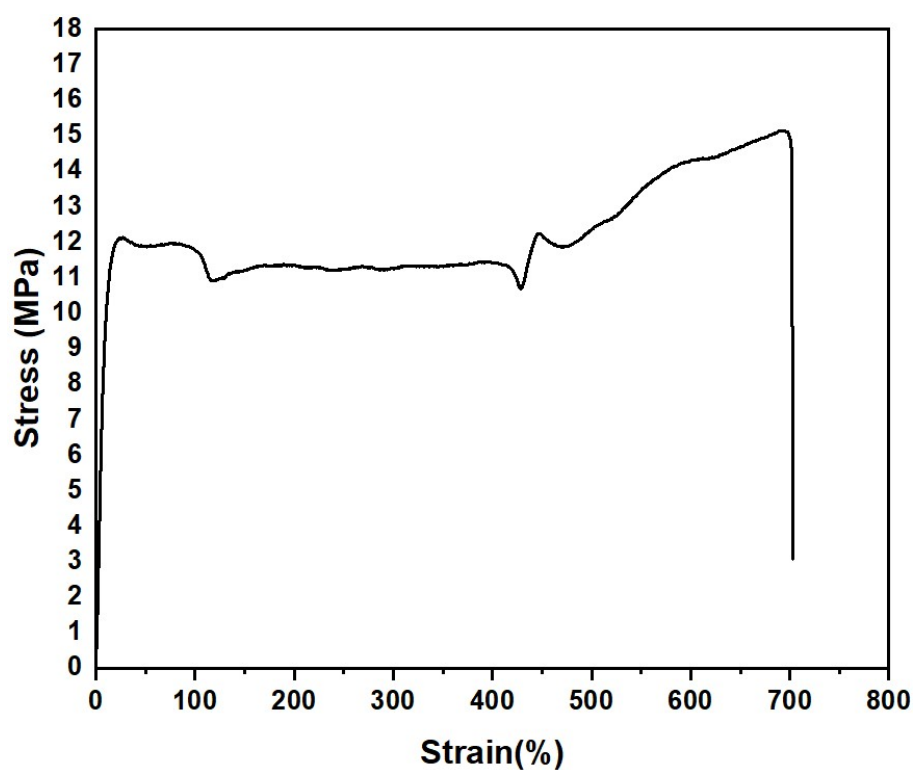

**Figure S60.** Tensile stress-strain curves for commercial LDPE. Yield stress = 12.1 MPa. Stress at break = 15.1 MPa, 703%.

## 10. Crystal Data

X-ray Structure of Complex **6a**. CCDC Number = 2412497.

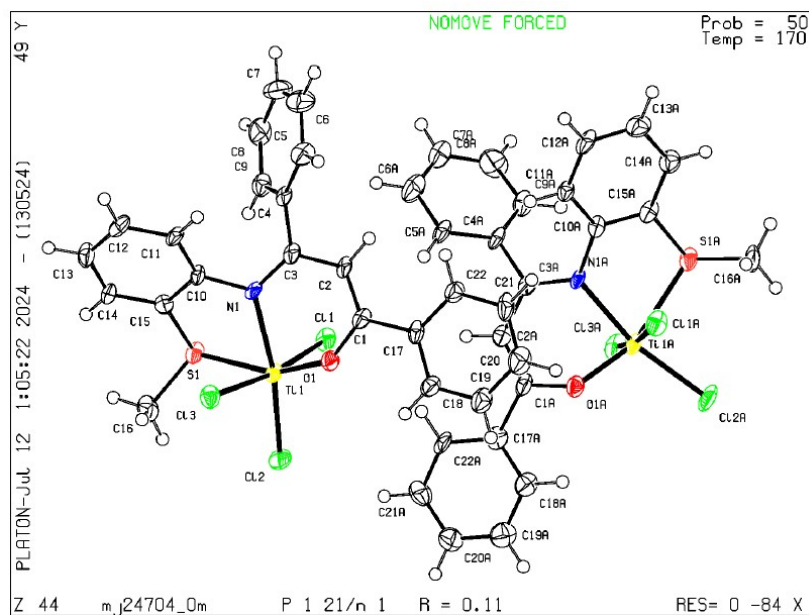

Bond precision: C-C = 0.0140 Å

Wavelength=1.34139

Cell: a=23.9688(16) b=8.5432(6) c=30.1063(18)  
alpha=90 beta=113.366(3) gamma=90  
Temperature: 170 K

|                        | Calculated                       | Reported             |
|------------------------|----------------------------------|----------------------|
| Volume                 | 5659.3(7)                        | 5659.3(7)            |
| Space group            | P 21/n                           | P 1 21/n 1           |
| Hall group             | -P 2yn                           | -P 2yn               |
| Moiety formula         | C22 H18 Cl3 N O S Ti [+ solvent] | C22 H18 Cl3 N O S Ti |
| Sum formula            | C22 H18 Cl3 N O S Ti [+ solvent] | C22 H18 Cl3 N O S Ti |
| Mr                     | 498.65                           | 498.68               |
| Dx, g cm <sup>-3</sup> | 1.171                            | 1.171                |
| Z                      | 8                                | 8                    |
| Mu (mm <sup>-1</sup> ) | 3.988                            | 3.988                |
| F000                   | 2032.0                           | 2032.0               |
| F000'                  | 2047.81                          |                      |
| h, k, lmax             | 29, 10, 36                       | 29, 10, 36           |
| Nref                   | 10803                            | 10739                |
| Tmin, Tmax             | 0.533, 0.819                     | 0.273, 0.751         |
| Tmin'                  | 0.483                            |                      |

Correction method= # Reported T Limits: Tmin=0.273 Tmax=0.751  
AbsCorr = MULTI-SCAN

Data completeness= 0.994

Theta(max)= 54.955

R(reflections)= 0.1138( 8265)

wR2(reflections)=  
0.2766( 10739)

S = 1.140

Npar= 526

X-ray Structure of Complex **6c**. CCDC Number = 2412499.

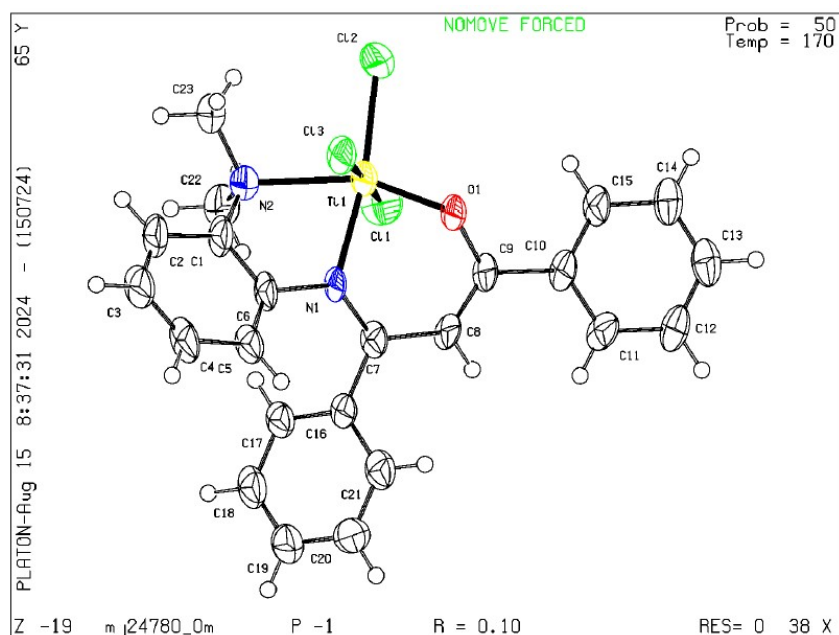

Bond precision: C-C = 0.0121 Å

Wavelength=1.34139

Cell: a=8.607(2) b=9.769(3) c=14.479(4)  
 alpha=99.660(12) beta=99.136(12) gamma=105.067(13)  
 Temperature: 170 K

|                        | Calculated          | Reported            |
|------------------------|---------------------|---------------------|
| Volume                 | 1132.4(5)           | 1132.5(5)           |
| Space group            | P -1                | P -1                |
| Hall group             | -P 1                | -P 1                |
| Moiety formula         | C23 H21 Cl3 N2 O Ti | C23 H21 Cl3 N2 O Ti |
| Sum formula            | C23 H21 Cl3 N2 O Ti | C23 H21 Cl3 N2 O Ti |
| Mr                     | 495.64              | 495.67              |
| Dx, g cm <sup>-3</sup> | 1.454               | 1.454               |
| Z                      | 2                   | 2                   |
| Mu (mm <sup>-1</sup> ) | 4.430               | 4.430               |
| F000                   | 508.0               | 508.0               |
| F000'                  | 511.42              |                     |
| h, k, lmax             | 10, 11, 17          | 10, 11, 17          |
| Nref                   | 4363                | 4284                |
| Tmin, Tmax             | 0.542, 0.801        | 0.251, 0.751        |
| Tmin'                  | 0.409               |                     |

Correction method= # Reported T Limits: Tmin=0.251 Tmax=0.751  
 AbsCorr = MULTI-SCAN

Data completeness= 0.982

Theta(max)= 55.274

R(reflections)= 0.0996( 2150)

wR2(reflections)=  
0.3127( 4284)

S = 1.000

Npar= 273

X-ray Structure of Complex **6d**. CCDC Number = 2412500.

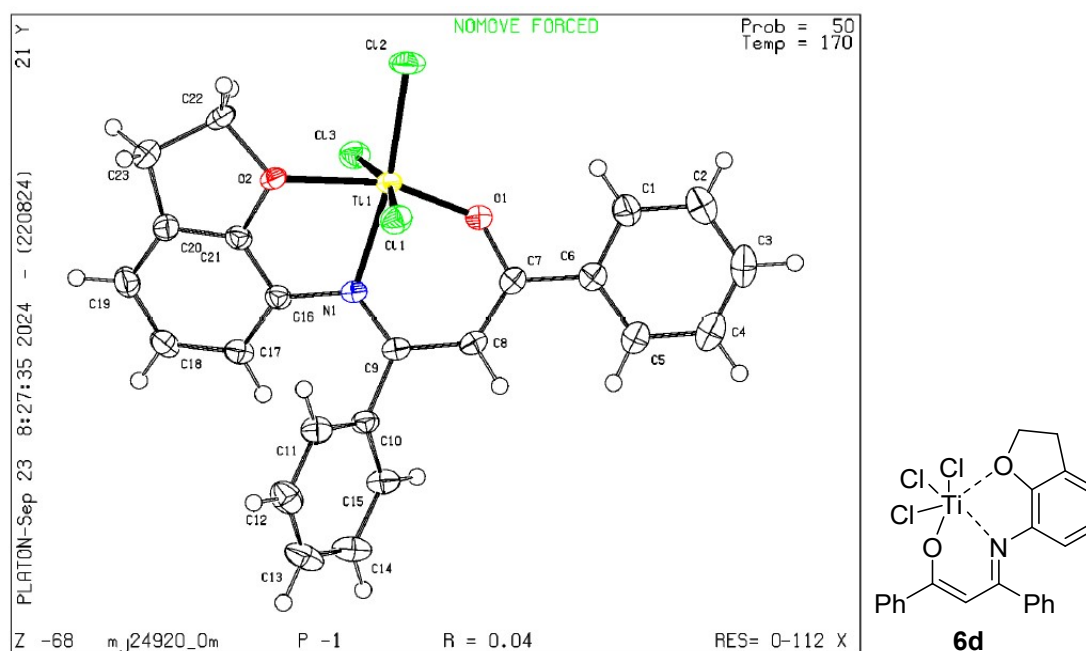

Bond precision: C-C = 0.0036 Å

Wavelength=1.34139

Cell: a=9.8830 (3) b=11.2698 (3) c=14.4470 (4)  
 alpha=105.467 (1) beta=94.575 (1) gamma=115.251 (1)  
 Temperature: 170 K

|                        | Calculated                      | Reported                        |
|------------------------|---------------------------------|---------------------------------|
| Volume                 | 1367.64 (7)                     | 1367.63 (7)                     |
| Space group            | P -1                            | P -1                            |
| Hall group             | -P 1                            | -P 1                            |
| Moiety formula         | C23 H18 Cl3 N O2 Ti [+ solvent] | 0.5(C23 H18 Cl3 N O2 Ti)        |
| Sum formula            | C23 H18 Cl3 N O2 Ti [+ solvent] | C11.50 H9 Cl1.50 N0.50 O Ti0.50 |
| Mr                     | 494.60                          | 247.32                          |
| Dx, g cm <sup>-3</sup> | 1.201                           | 1.201                           |
| Z                      | 2                               | 4                               |
| Mu (mm <sup>-1</sup> ) | 3.680                           | 3.680                           |
| F000                   | 504.0                           | 504.0                           |
| F000'                  | 507.46                          |                                 |
| h, k, lmax             | 12, 13, 17                      | 12, 13, 17                      |
| Nref                   | 5221                            | 5108                            |
| Tmin, Tmax             | 0.562, 0.832                    | 0.544, 0.751                    |
| Tmin'                  | 0.509                           |                                 |

Correction method= # Reported T Limits: Tmin=0.544 Tmax=0.751  
 AbsCorr = MULTI-SCAN

Data completeness= 0.978

Theta(max)= 55.008

R(reflections)= 0.0391 ( 4820)

wR2(reflections)=  
0.1105 ( 5108)

S = 1.060

Npar= 271



X-ray Structure of Complex **6e**. CCDC Number = 2412502.

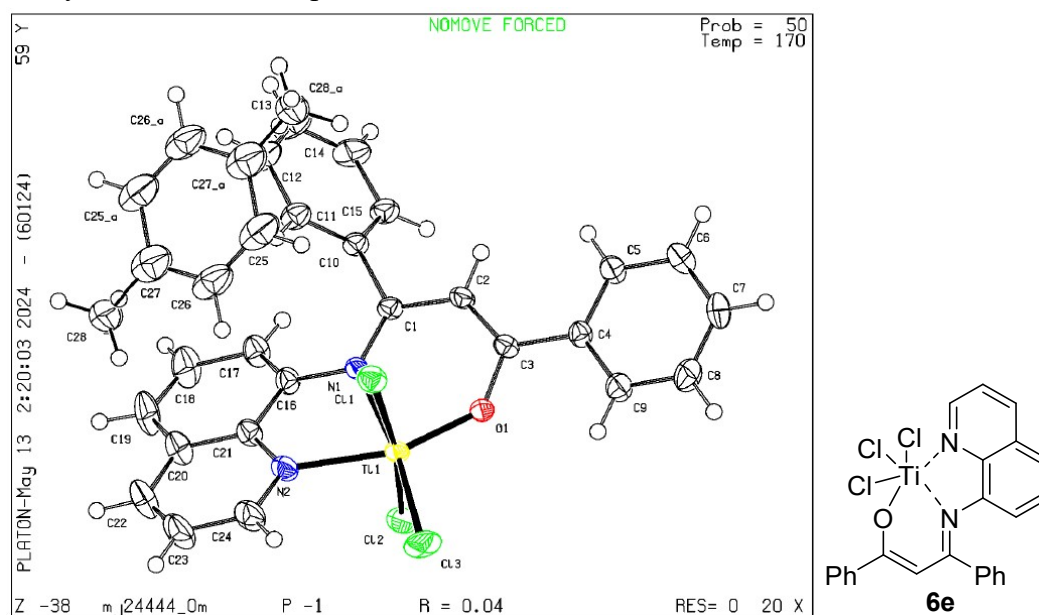

Bond precision: C-C = 0.0037 Å

Wavelength=1.34139

Cell: a=9.7237 (2) b=11.7183 (3) c=14.3455 (3)  
 alpha=108.652 (1) beta=109.153 (1) gamma=92.134 (1)  
 Temperature: 170 K

|                        | Calculated                                | Reported                     |
|------------------------|-------------------------------------------|------------------------------|
| Volume                 | 1444.45 (6)                               | 1444.44 (6)                  |
| Space group            | P -1                                      | P -1                         |
| Hall group             | -P 1                                      | -P 1                         |
| Moiety formula         | 2(C24 H17 Cl3 N2 O Ti), C7 H8 [+ solvent] | C24 H17 Cl3 N2 O Ti, C3.5 H4 |
| Sum formula            | C55 H42 Cl6 N4 O2 Ti2 [+ solvent]         | C27.50 H21 Cl3 N2 O Ti       |
| Mr                     | 1099.37                                   | 549.71                       |
| Dx, g cm <sup>-3</sup> | 1.264                                     | 1.264                        |
| Z                      | 1                                         | 2                            |
| Mu (mm <sup>-1</sup> ) | 3.509                                     | 3.509                        |
| F000                   | 562.0                                     | 562.0                        |
| F000'                  | 565.53                                    |                              |
| h, k, lmax             | 11, 14, 17                                | 11, 14, 17                   |
| Nref                   | 5501                                      | 5464                         |
| Tmin, Tmax             | 0.578, 0.839                              | 0.429, 0.751                 |
| Tmin'                  | 0.524                                     |                              |

Correction method= # Reported T Limits: Tmin=0.429 Tmax=0.751  
 AbsCorr = MULTI-SCAN

Data completeness= 0.993 Theta(max)= 54.921

R(reflections)= 0.0389 ( 4677) wR2(reflections)=  
 0.1064 ( 5464)  
 S = 1.070 Npar= 317



## References:

1. A. Rossi, *Macromolecules* 1995, **28**, 1739.
2. Q. Huang, Q. Wu, F. Zhu, S. Lin, *J. Polym. Sci. Part A: Polym. Chem.* 2001, **39**, 4068.
3. M. J. Frisch, G. W. Trucks, H. B. Schlegel, G. E. Scuseria, M. A. Robb, J. R. Cheeseman, G. Scalmani, V. Barone, G. A. Petersson, H. Nakatsuji, X. Li, M. Caricato, A. V. Marenich, J. Bloino, B. G. Janesko, R. Gomperts, B. Mennucci, H. P. Hratchian, J. V. Ortiz, A. F. Izmaylov, J. L. Sonnenberg, D. Williams-Young, F. Ding, F. Lipparini, F. Egidi, J. Goings, B. Peng, A. Petrone, T. Henderson, D. Ranasinghe, V. G. Zakrzewski, J. Gao, N. Rega, G. Zheng, W. Liang, M. Hada, M. Ehara, K. Toyota, R. Fukuda, J. Hasegawa, M. Ishida, T. Nakajima, Y. Honda, O. Kitao, H. Nakai, T. Vreven, K. Throssell, J. A. Montgomery, Jr., J. E. Peralta, F. Ogliaro, M. J. Bearpark, J. J. Heyd, E. N. Brothers, K. N. Kudin, V. N. Staroverov, T. A. Keith, R. Kobayashi, J. Normand, K. Raghavachari, A. P. Rendell, J. C. Burant, S. S. Iyengar, J. Tomasi, M. Cossi, J. M. Millam, M. Klene, C. Adamo, R. Cammi, J. W. Ochterski, R. L. Martin, K. Morokuma, O. Farkas, J. B. Foresman, D. J. Fox, *Gaussian 16, Revision B.01*, Gaussian, Inc., Wallingford CT, 2016.
4. A. D. Becke, *Phys. Rev. A*. 1988, **38**, 3098.
5. C. Lee, W. Yang, R. G. Parr, *Phys. Rev. B*. 1988, **37**, 785.
6. S. Grimme, J. Antony, S. Ehrlich, H. Krieg, *J. Chem. Phys.* 2010, **132**, 154104.
7. A. D. McLean, G. S. Chandler, *J. Chem. Phys.* 1980, **72**, 5639.
8. R. Krishnan, J. S. Binkley, R. Seeger, J. A. Pople, *J. Chem. Phys.* 1980, **72**, 650.
9. R. C. Binning, L. A. Curtiss, *J. Comput. Chem.* 1990, **11**, 1206.
10. L. Falivene, R. Credendino, A. Poater, A. Petta, L. Serra, R. Oliva, V. Scarano, L. Cavallo, *Organometallics* 2016, **35**, 2286.
11. Z. Chen, J.-F. Li, W.-J. Tao, X.-L. Sun, X.-H. Yang, Y. Tang, *Macromolecules* 2013, **46**, 2870.
